# Supplementary material
Source: PubMed Central journal article supplement (PMC6733175)

# Supporting Information

## Electrochemical Alkoxysulfonylation Difunctionalization of Styrene Derivatives Using Sodium Sulfinates as Sulfonyl Sources

Haibo Mei, Jiang Liu, Yunjie Guo, Jianlin Han\*

College of Chemical Engineering, Nanjing Forestry University, Nanjing 210037 Jiangsu China

Email: hanjl@njfu.edu.cn

### Table of Contents

|                                                                                                          |           |
|----------------------------------------------------------------------------------------------------------|-----------|
| <b>1. <math>^1\text{H}</math>, <math>^{13}\text{C}</math> and <math>^{19}\text{F}</math> NMR spectra</b> | <b>S2</b> |
|----------------------------------------------------------------------------------------------------------|-----------|

# 1. $^1\text{H}$ , $^{13}\text{C}$ and $^{19}\text{F}$ NMR spectra

Figure S1.  $^1\text{H}$ -NMR (600 MHz,  $\text{CDCl}_3$ ) of **3a**:

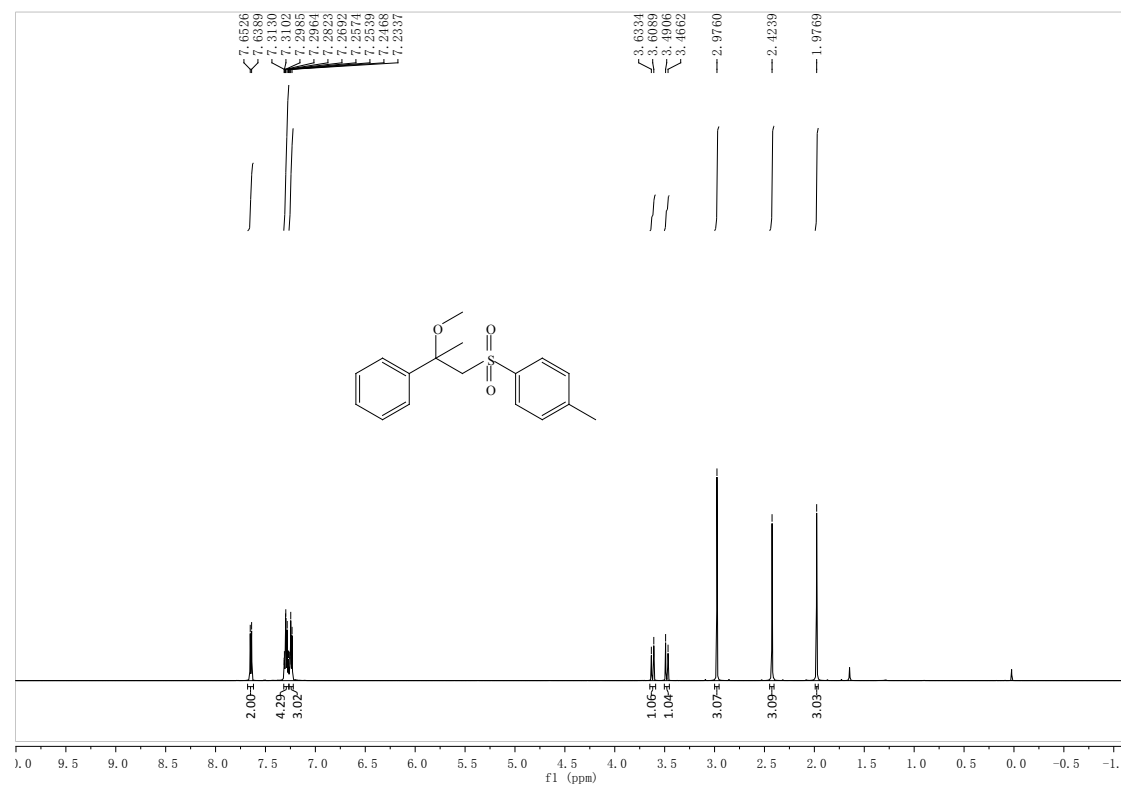

**Figure S2.**  $^1\text{H-NMR}$  (600 MHz,  $\text{CDCl}_3$ ) of **3b**:

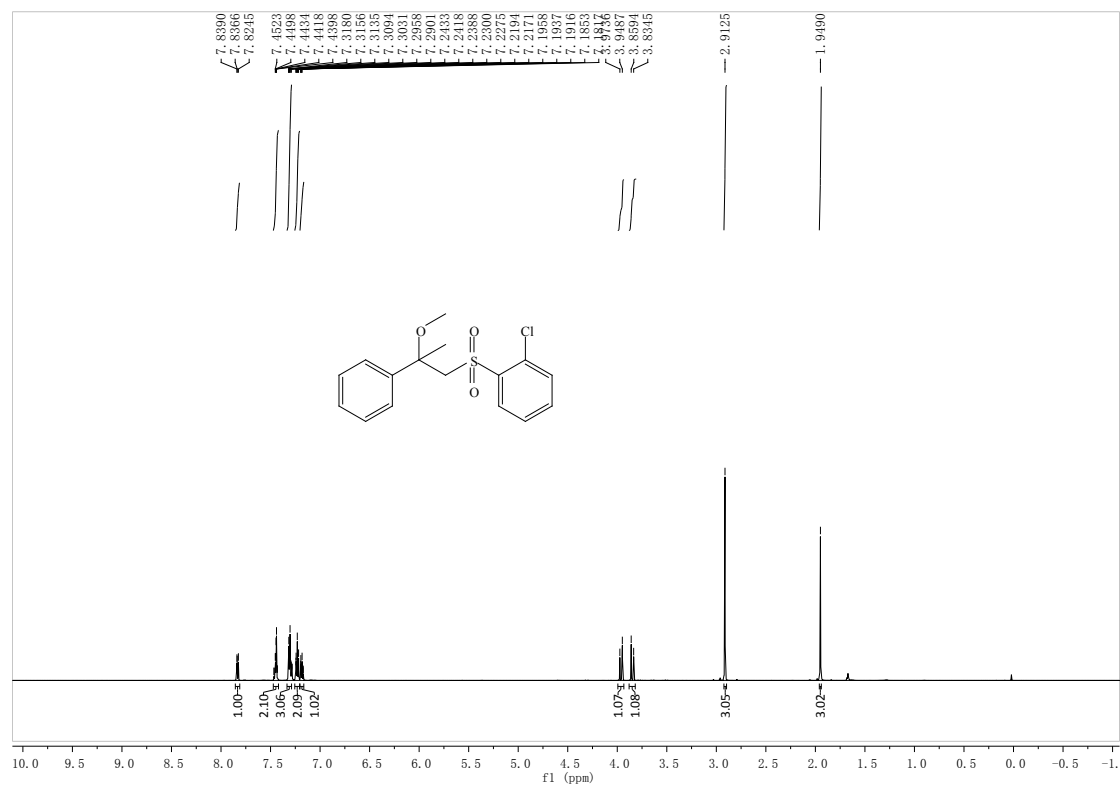

**Figure S3.**  $^{13}\text{C}\{^1\text{H}\}$ NMR (150 MHz,  $\text{CDCl}_3$ ) of **3b**:

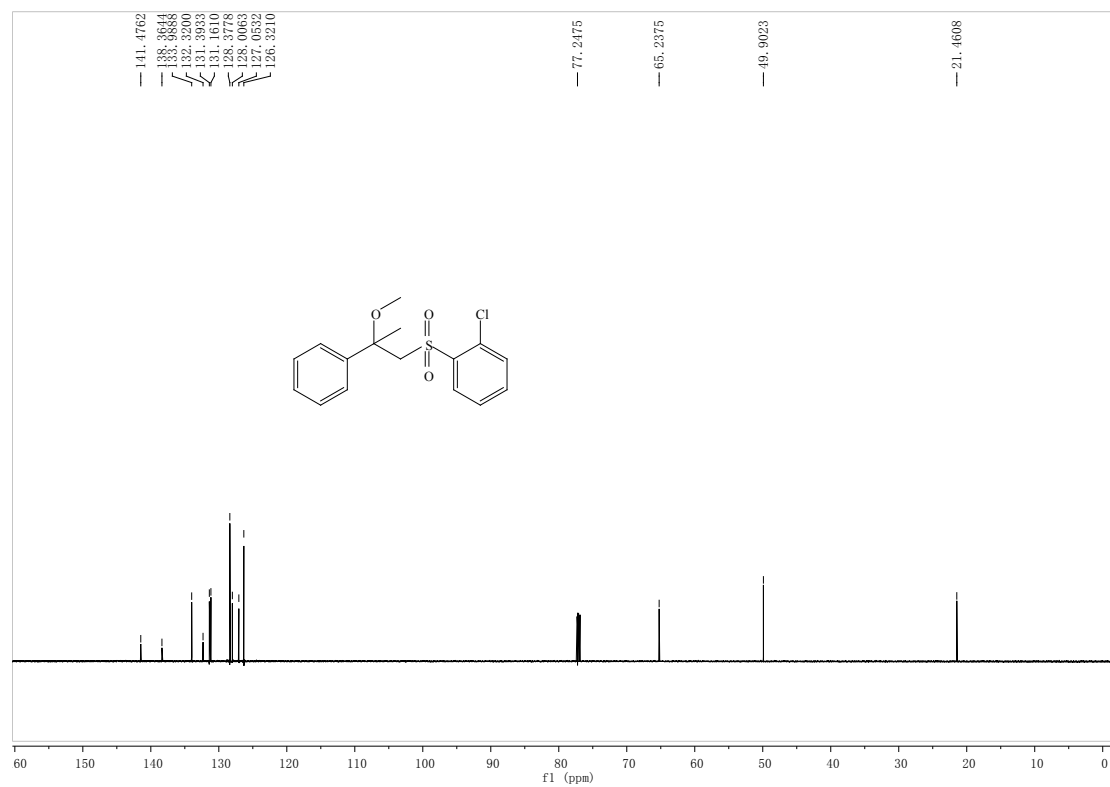

Figure S4.  $^1\text{H-NMR}$  (600 MHz,  $\text{CDCl}_3$ ) of **3c**:

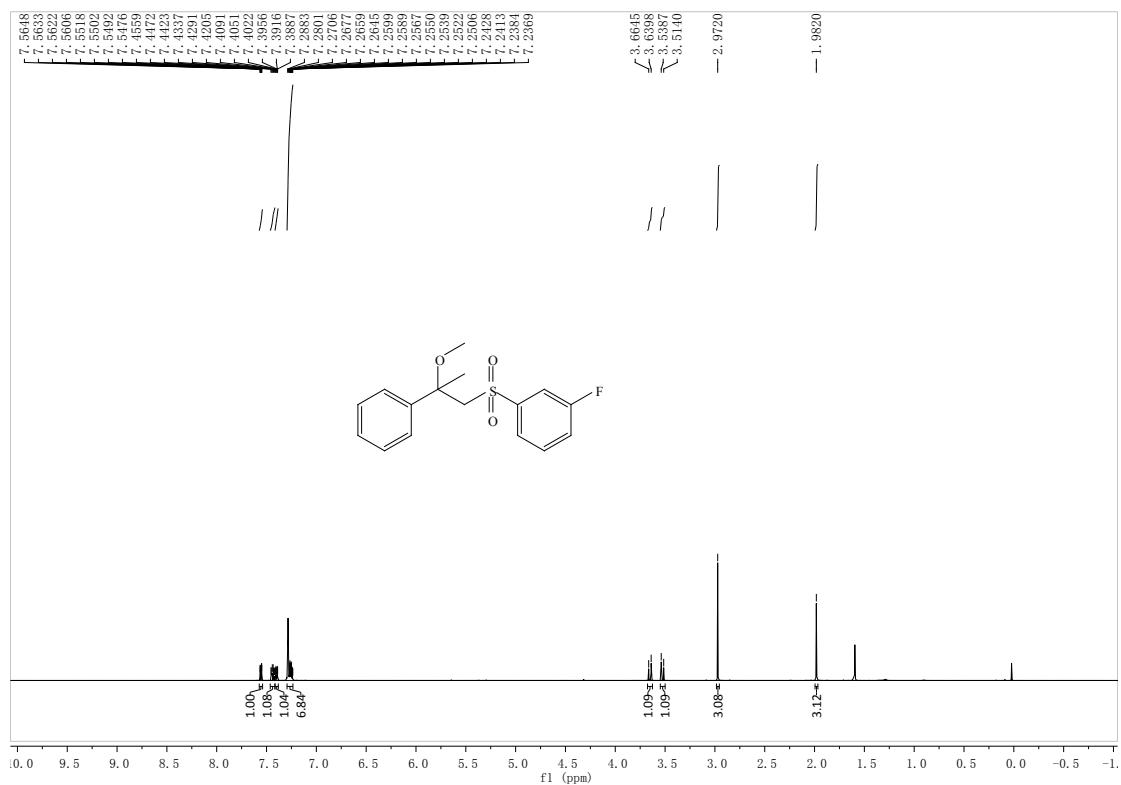

Figure S5.  $^{13}\text{C}\{^1\text{H}\}$ NMR (150 MHz,  $\text{CDCl}_3$ ) of **3c**:

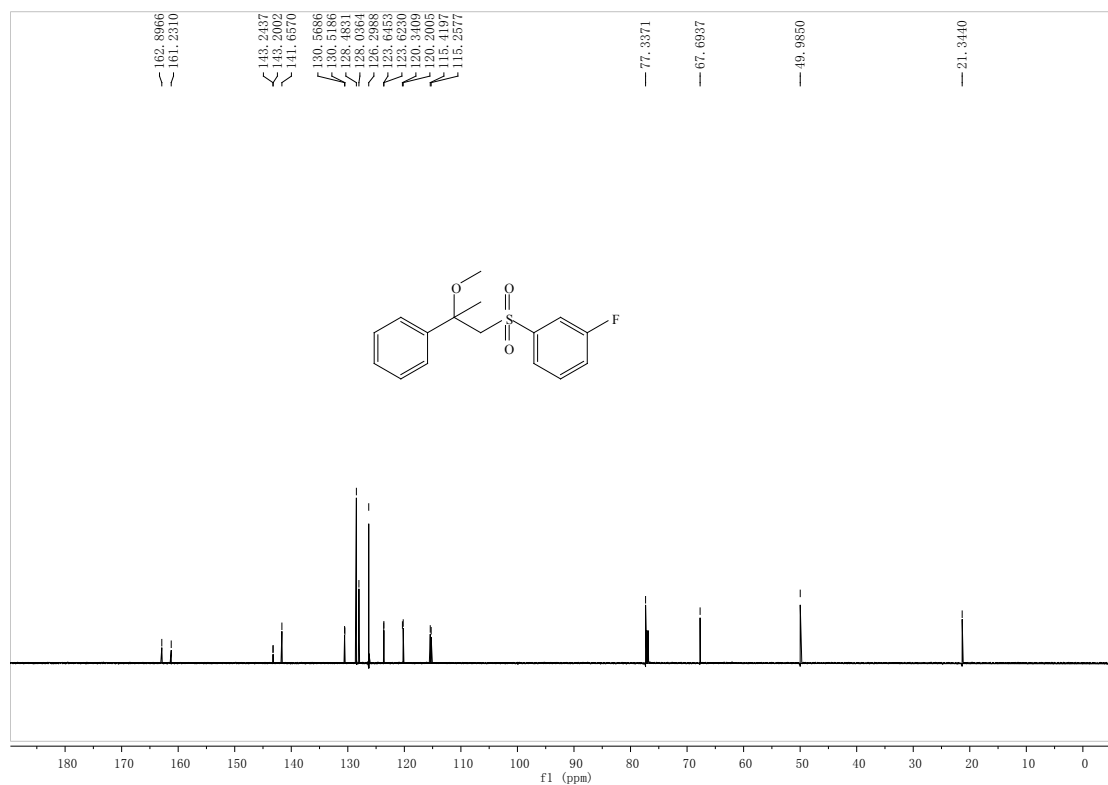

**Figure S6.**  $^{19}\text{F}$  NMR (565 MHz,  $\text{CDCl}_3$ ) of **3c**:

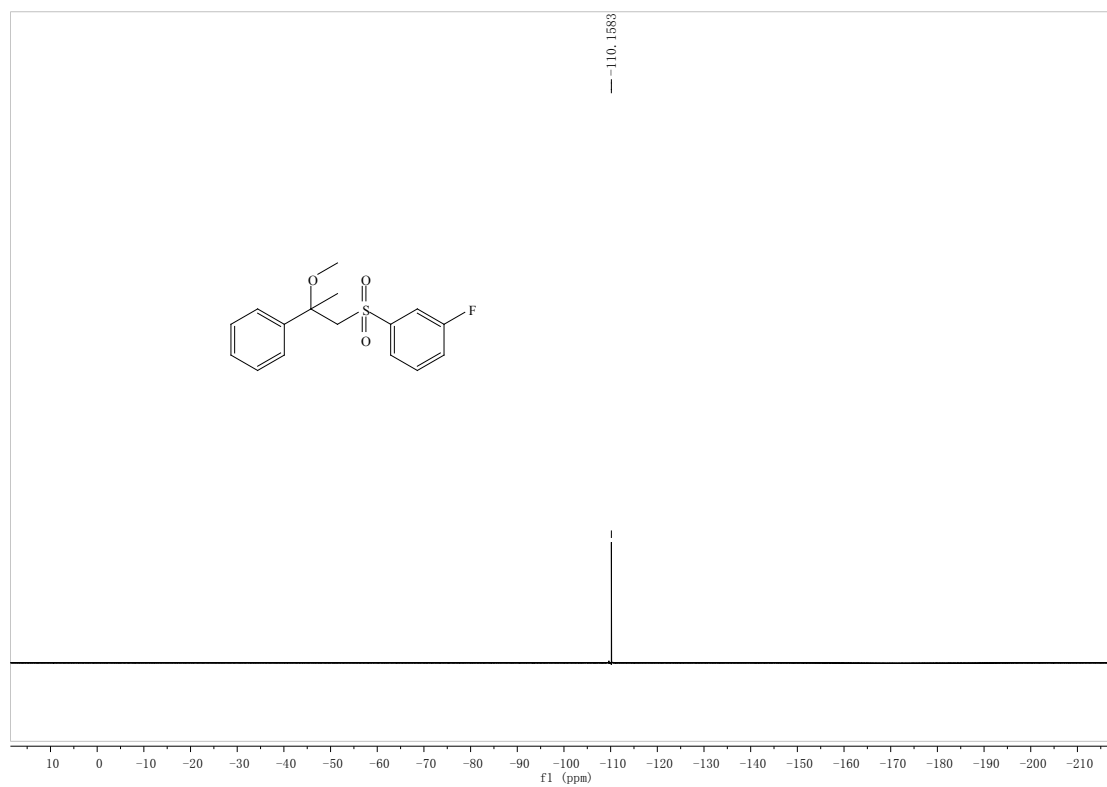

Figure S7.  $^1\text{H-NMR}$  (600 MHz,  $\text{CDCl}_3$ ) of **3d**:

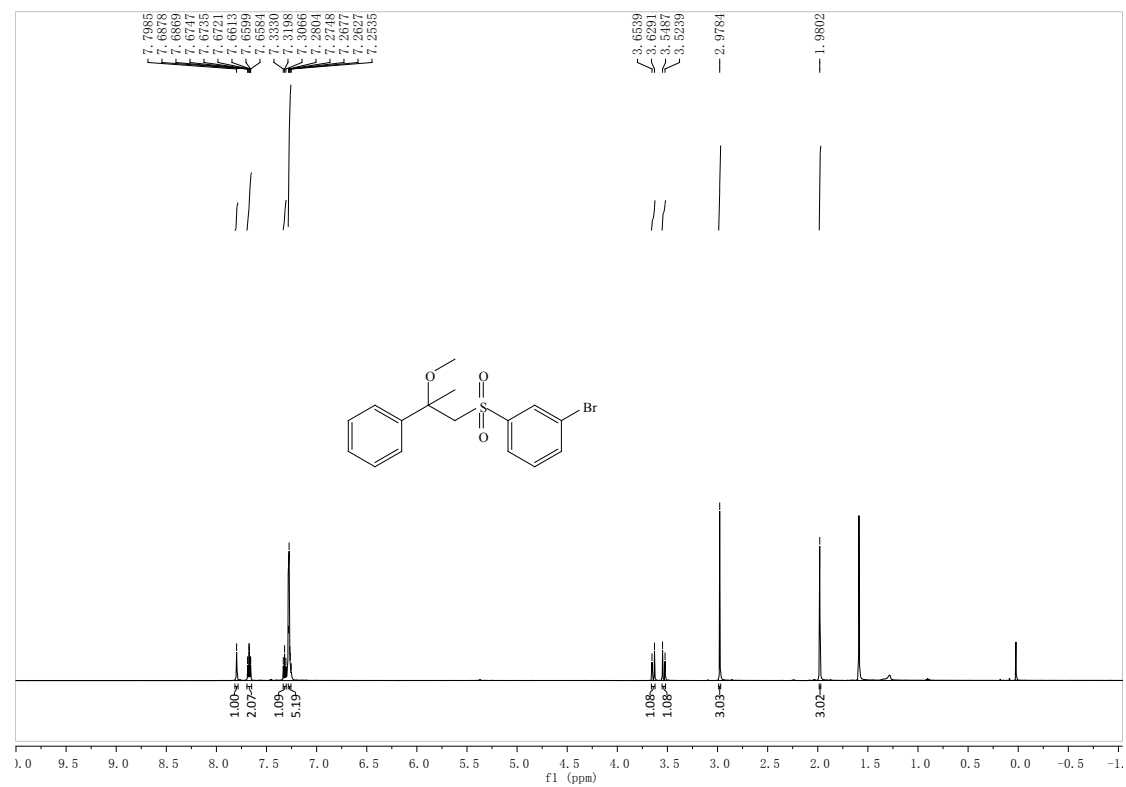

Figure S8.  $^{13}\text{C}\{^1\text{H}\}$ NMR (150 MHz,  $\text{CDCl}_3$ ) of **3d**:

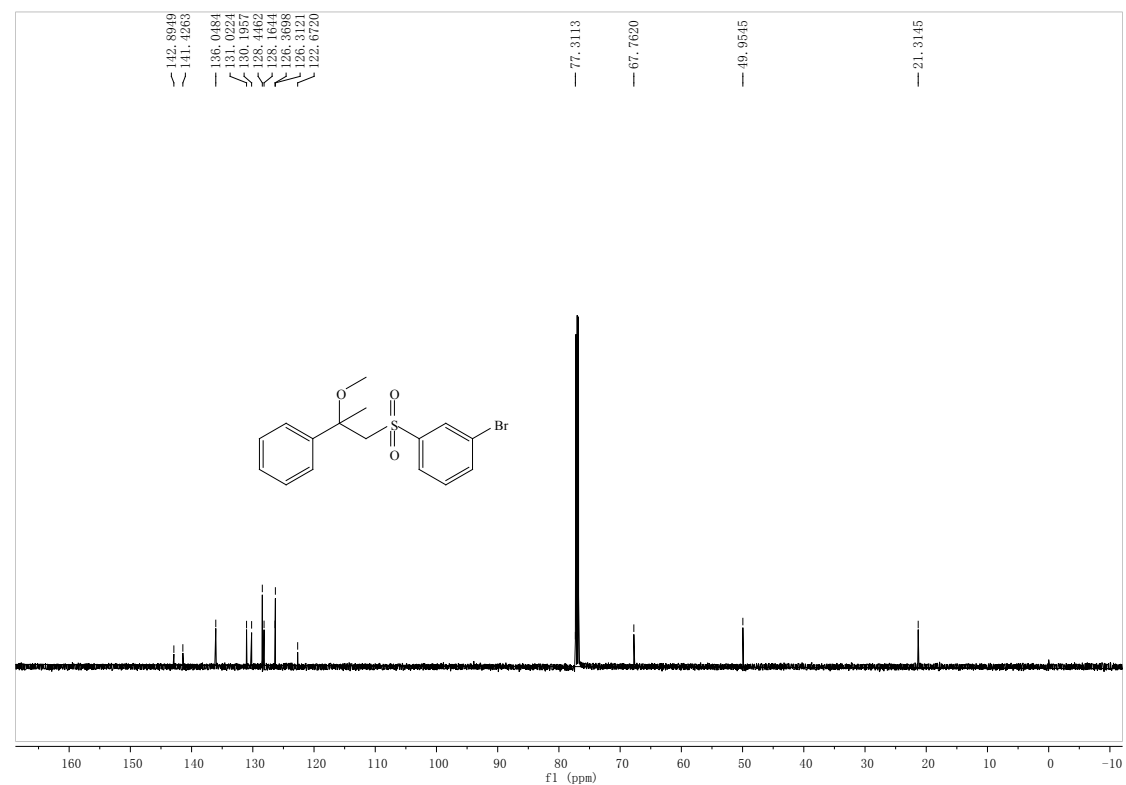

Figure S9.  $^1\text{H-NMR}$  (600 MHz,  $\text{CDCl}_3$ ) of **3e**:

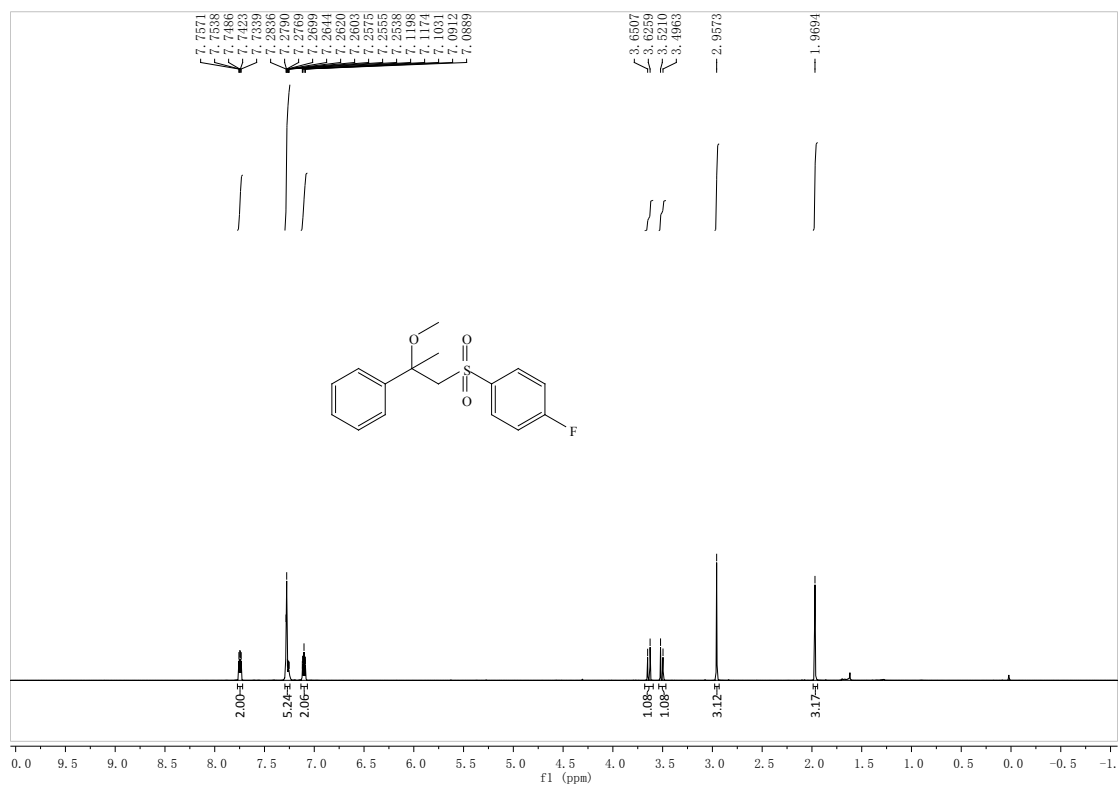

Figure S10.  $^{13}\text{C}\{^1\text{H}\}$ NMR (150 MHz,  $\text{CDCl}_3$ ) of **3e**:

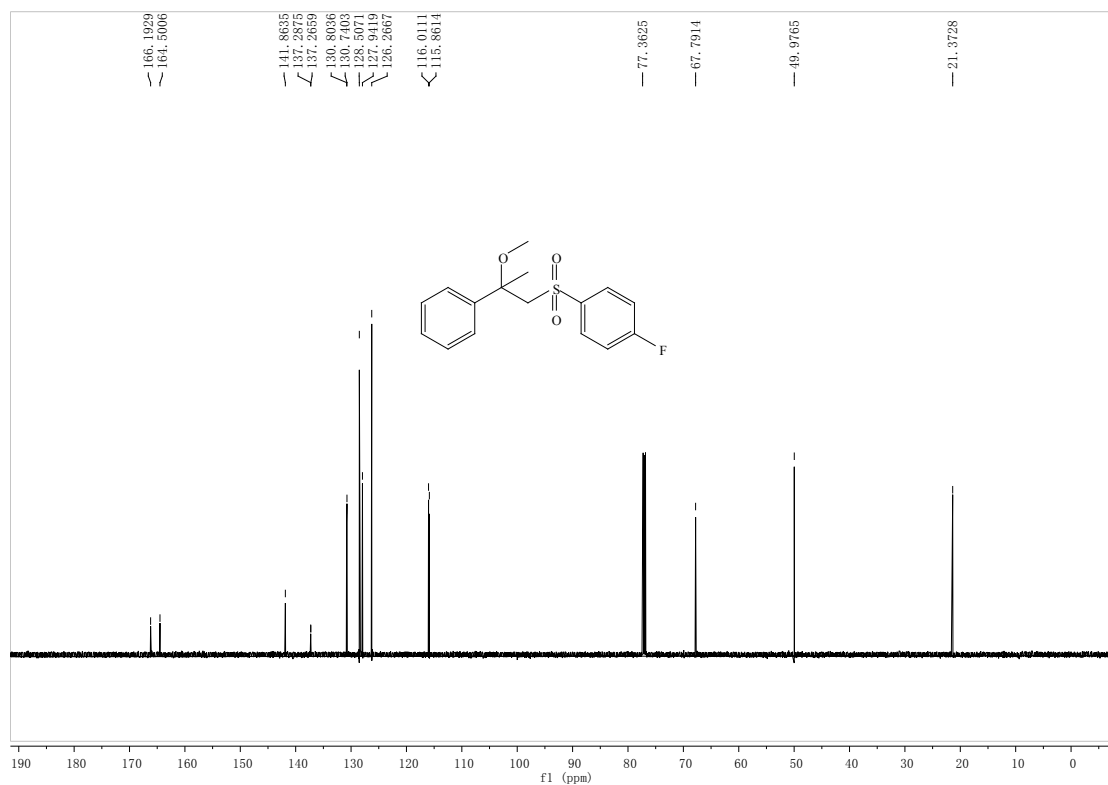

**Figure S11.**  $^{19}\text{F}$  NMR (565 MHz,  $\text{CDCl}_3$ ) of **3e**:

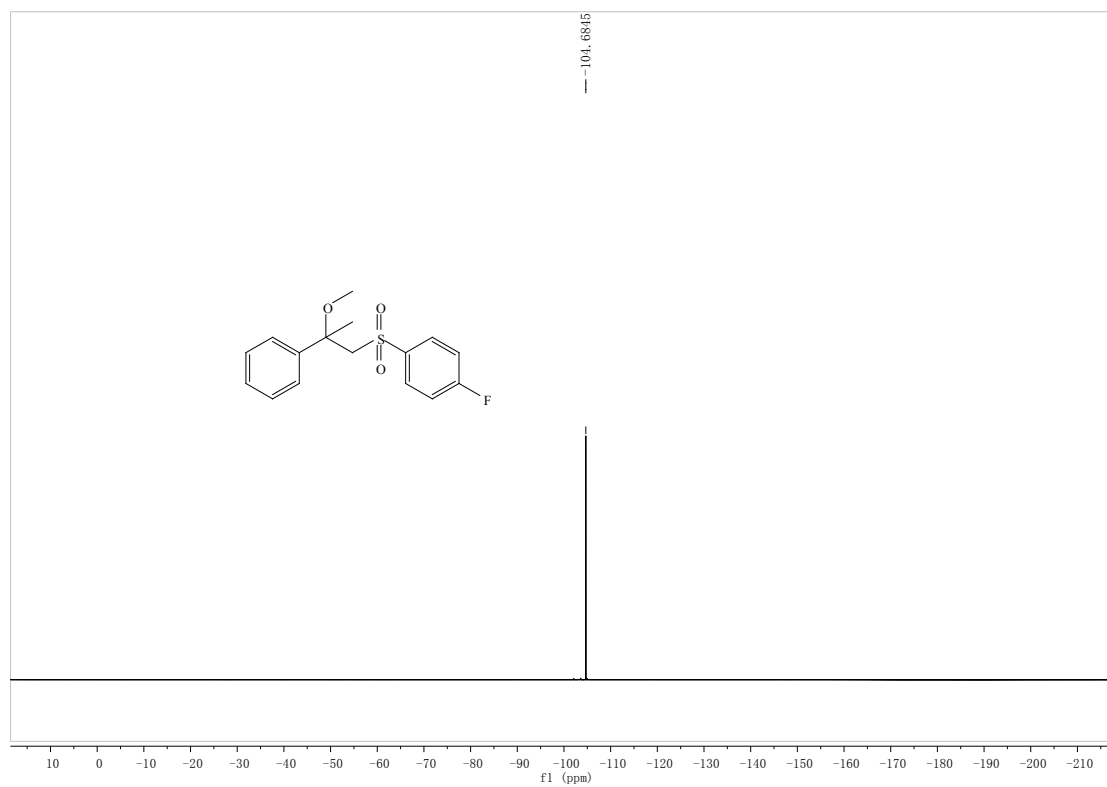



**Figure S12.**  $^1\text{H-NMR}$  (600 MHz,  $\text{CDCl}_3$ ) of **3f**:

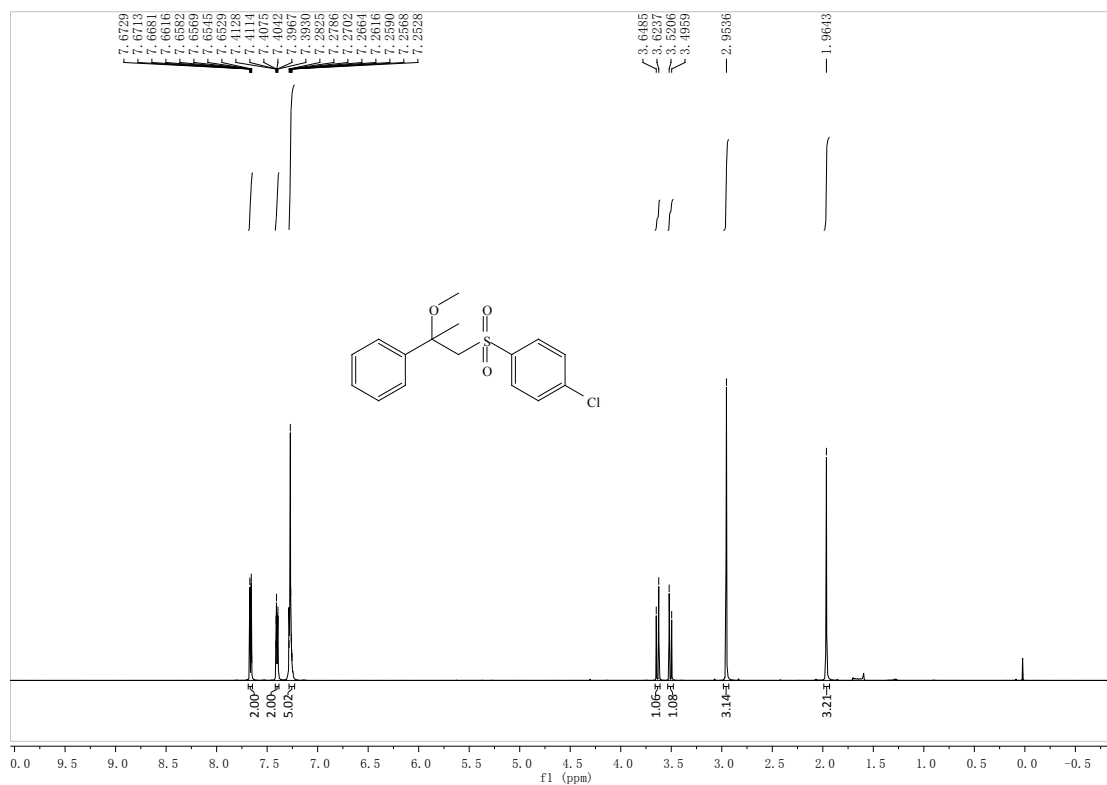

**Figure S13.**  $^{13}\text{C}\{^1\text{H}\}$  NMR (150 MHz,  $\text{CDCl}_3$ ) of **3f**:

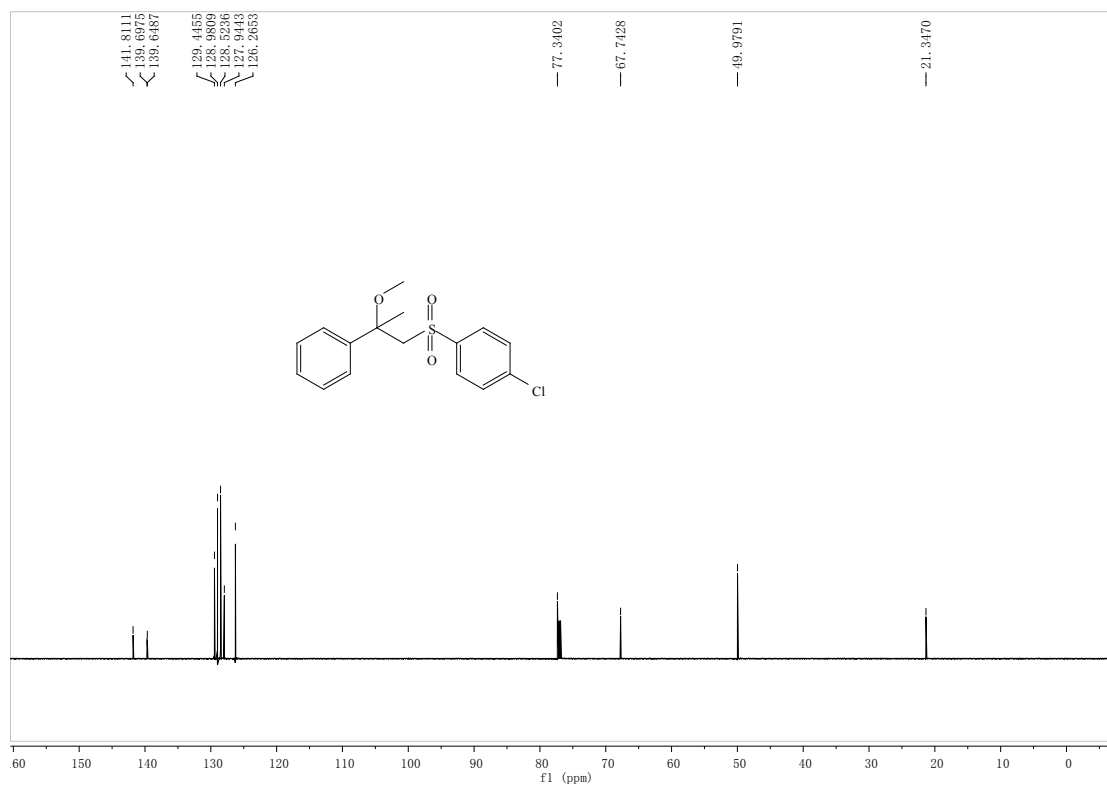

**Figure S14.**  $^1\text{H-NMR}$  (600 MHz,  $\text{CDCl}_3$ ) of **3g**:

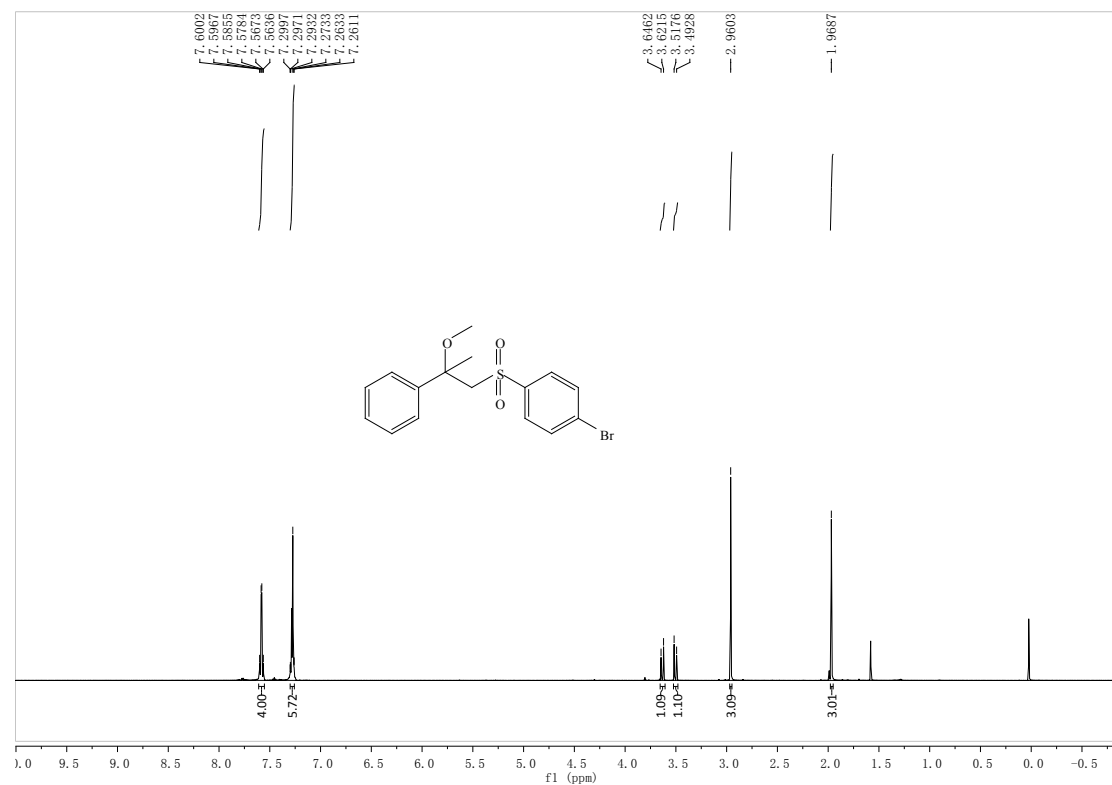

**Figure S15.**  $^{13}\text{C}\{^1\text{H}\}$  NMR (150 MHz,  $\text{CDCl}_3$ ) of **3g**:

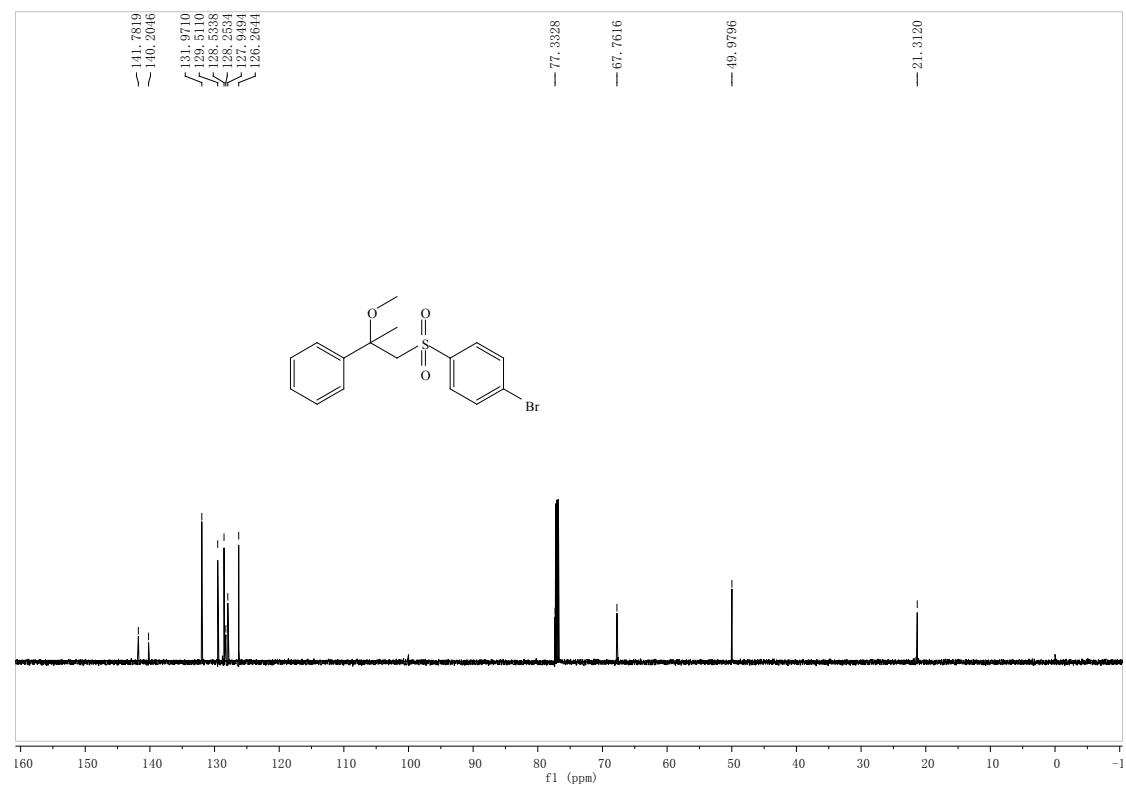

**Figure S16.**  $^1\text{H-NMR}$  (600 MHz,  $\text{CDCl}_3$ ) of **3h**:

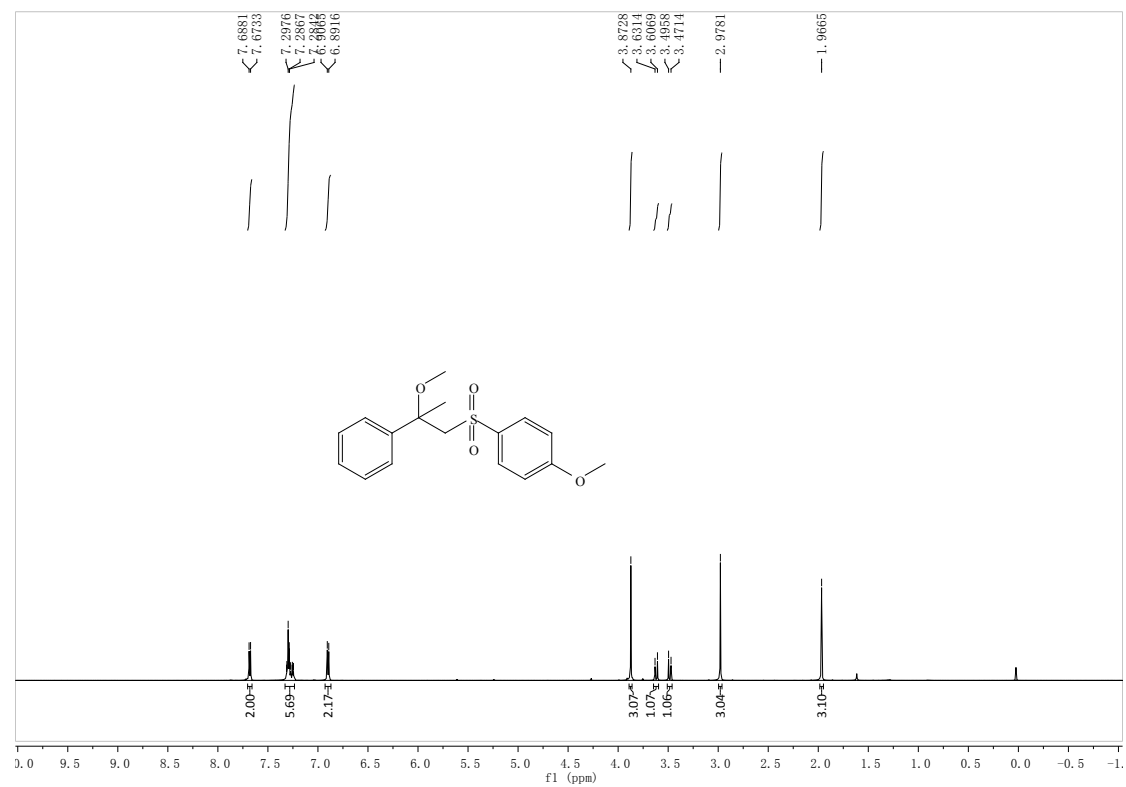

**Figure S17.**  $^{13}\text{C}\{^1\text{H}\}$  NMR (150 MHz,  $\text{CDCl}_3$ ) of **3h**:

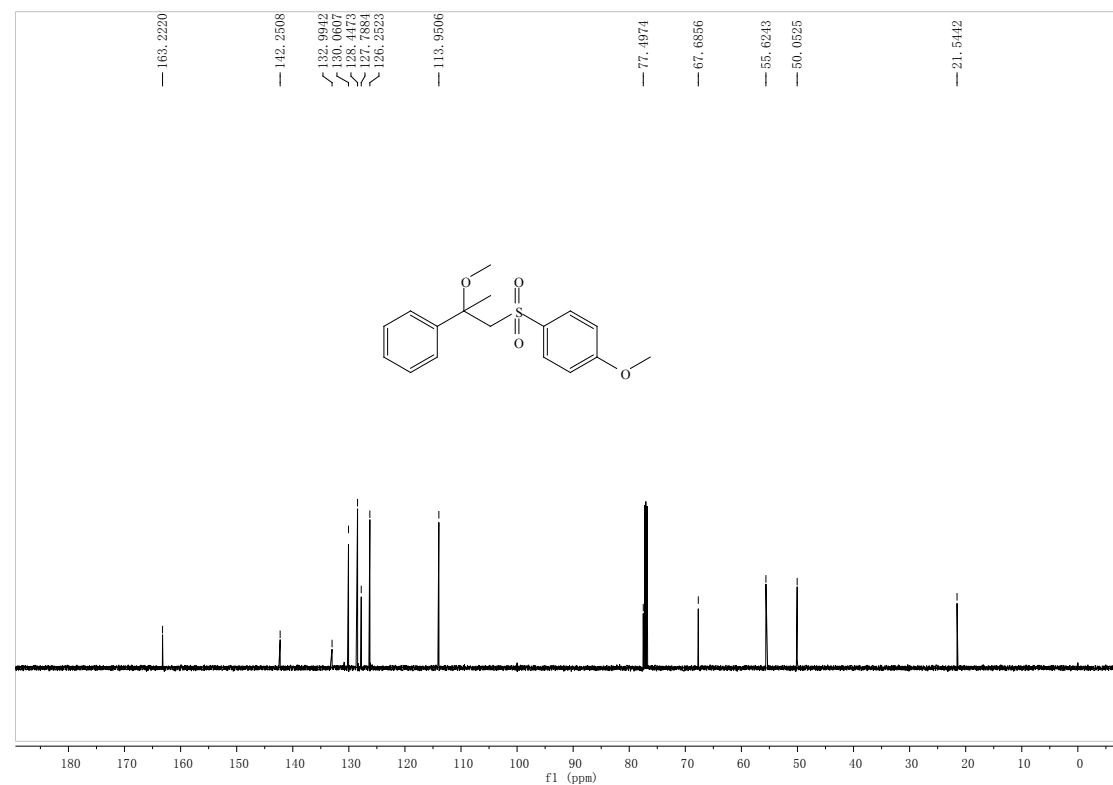

**Figure S18.**  $^1\text{H-NMR}$  (600 MHz,  $\text{CDCl}_3$ ) of **3i**:

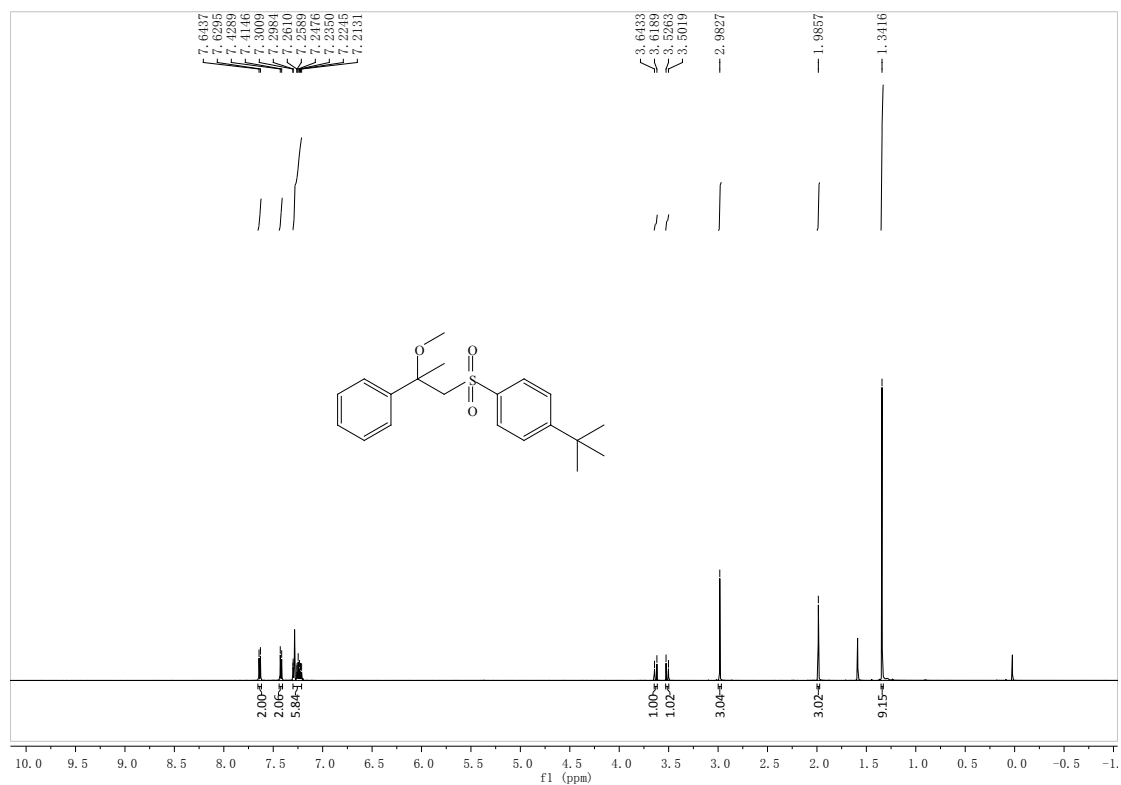

**Figure S19.**  $^{13}\text{C}\{^1\text{H}\}$  NMR (150 MHz,  $\text{CDCl}_3$ ) of **3i**:

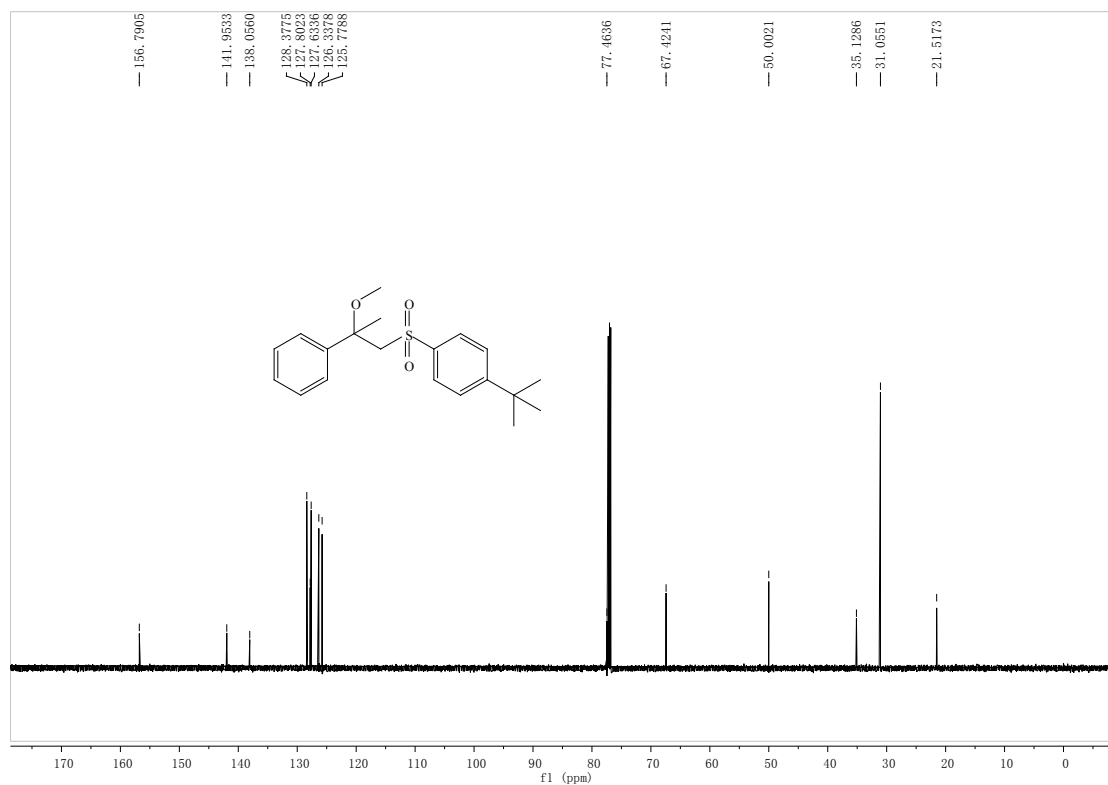

Figure S20.  $^1\text{H-NMR}$  (600 MHz,  $\text{CDCl}_3$ ) of **3j**:

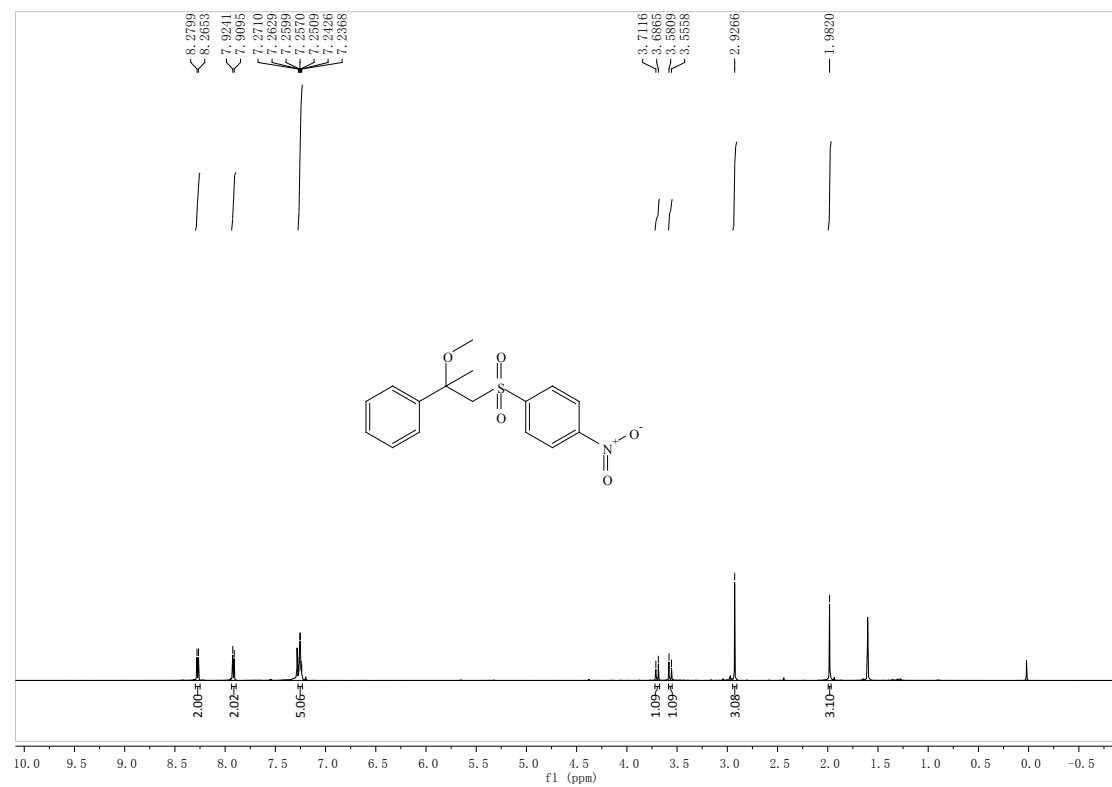

Figure S21.  $^{13}\text{C}\{^1\text{H}\}$  NMR (150 MHz,  $\text{CDCl}_3$ ) of **3j**:

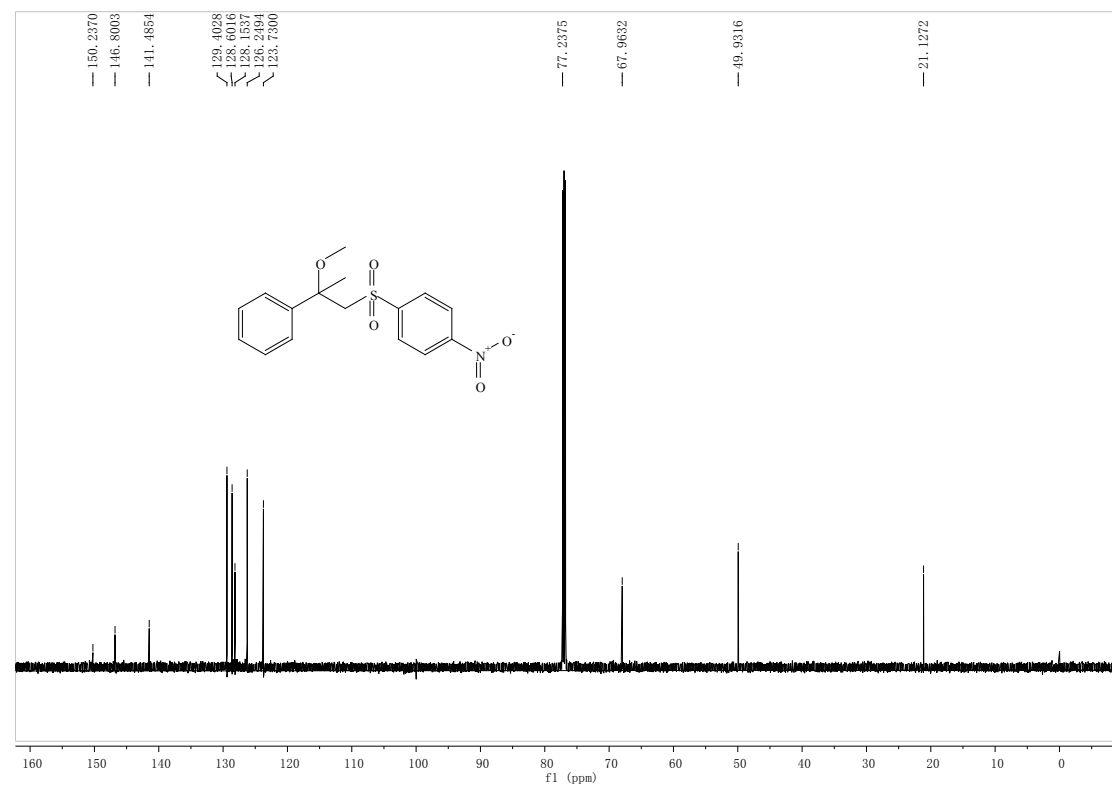

**Figure S22.**  $^1\text{H-NMR}$  (600 MHz,  $\text{CDCl}_3$ ) of **3k**:

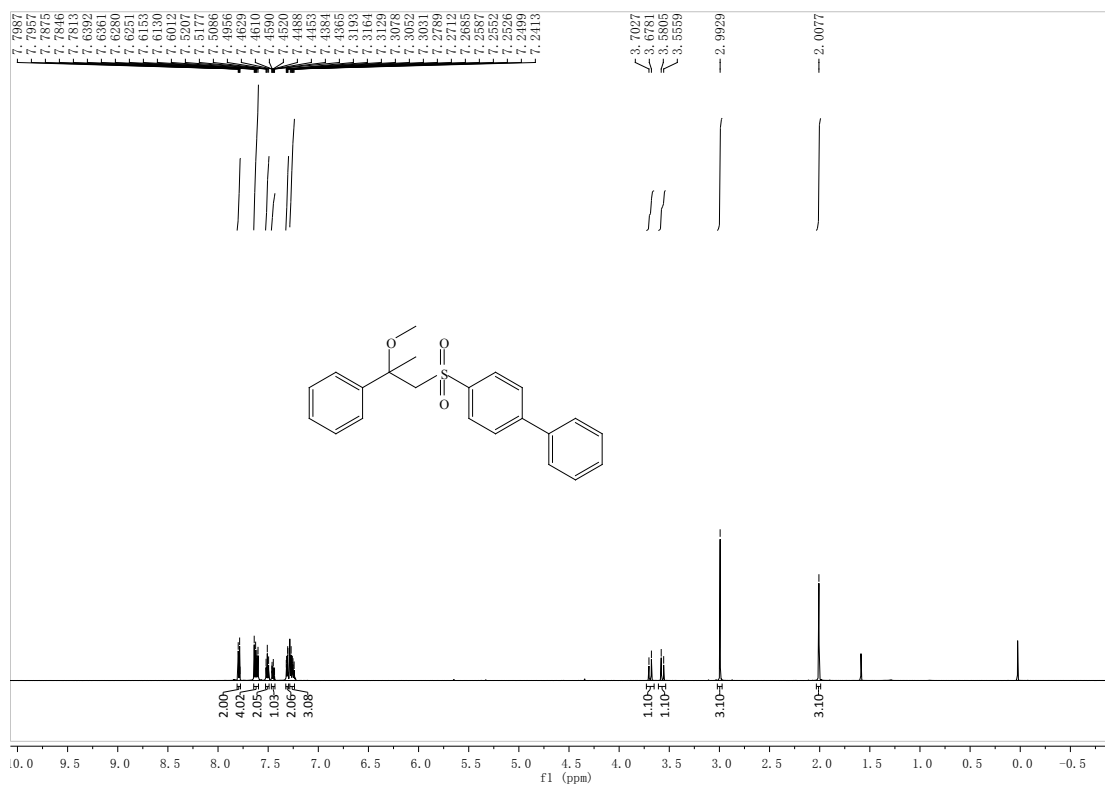

**Figure S23.**  $^{13}\text{C}\{^1\text{H}\}$  NMR (150 MHz,  $\text{CDCl}_3$ ) of **3k**:

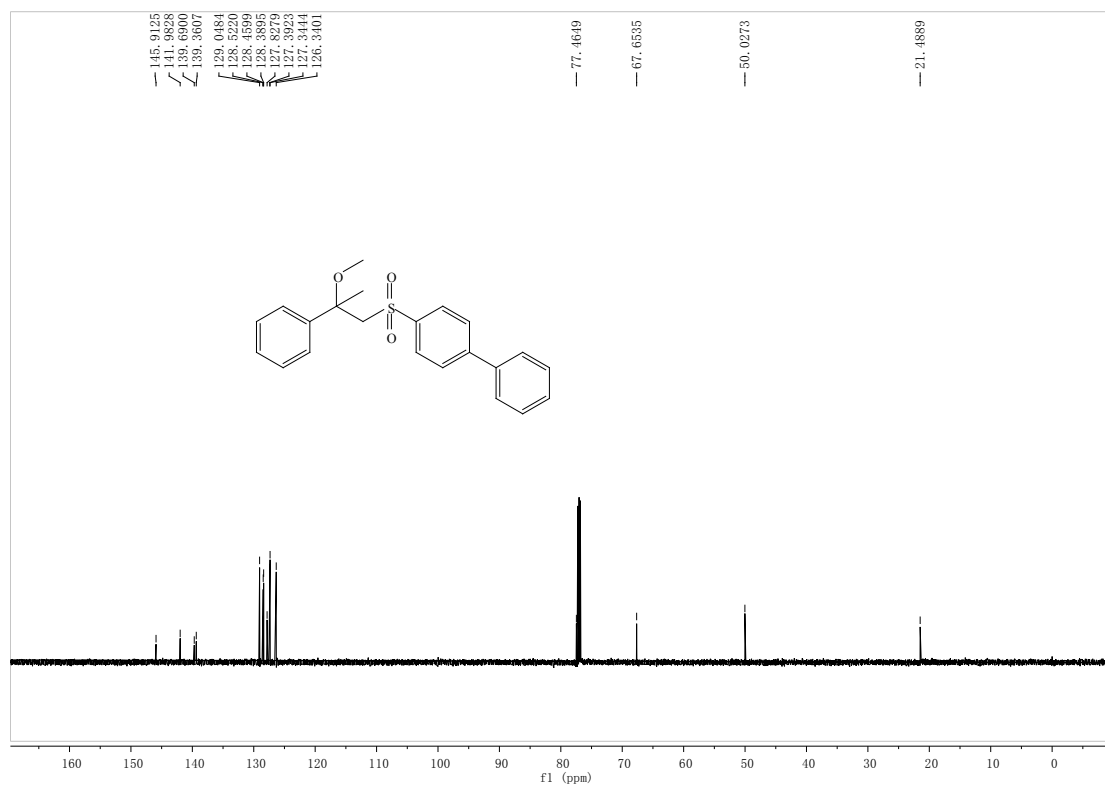

Figure S24.  $^1\text{H-NMR}$  (600 MHz,  $\text{CDCl}_3$ ) of **4a**:

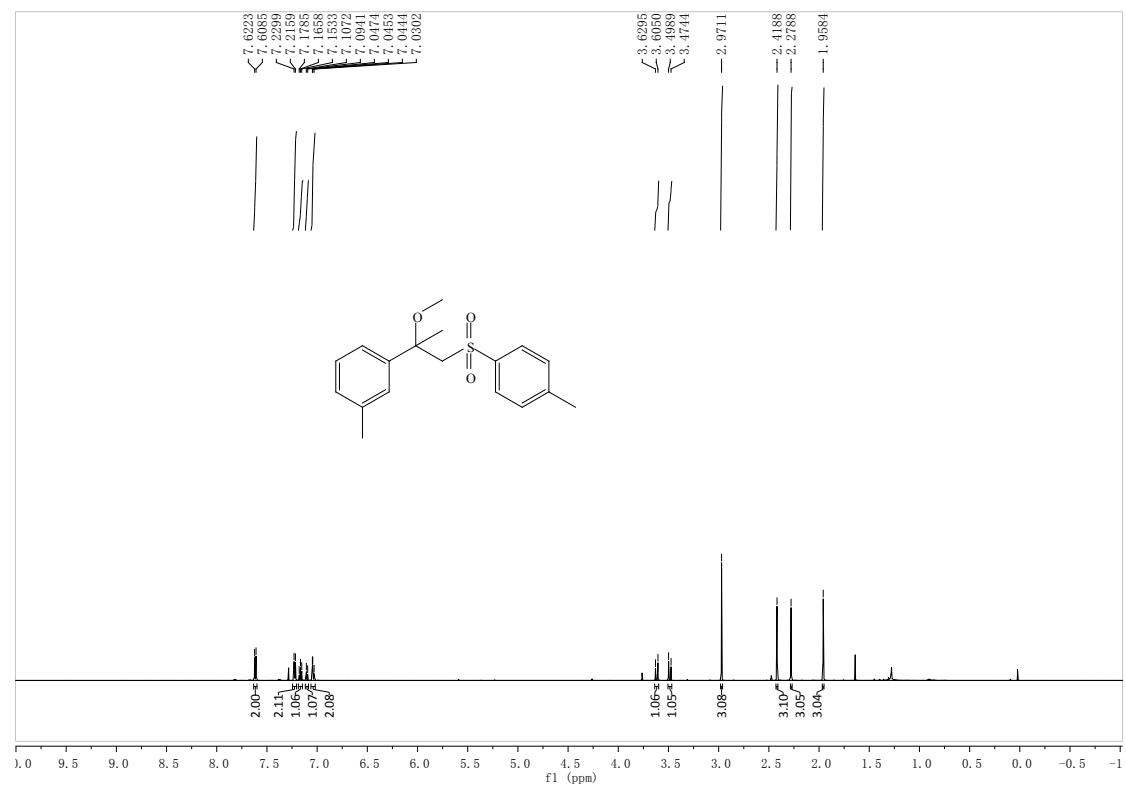

Figure S25.  $^{13}\text{C}\{^1\text{H}\}$  NMR (150 MHz,  $\text{CDCl}_3$ ) of **4a**:

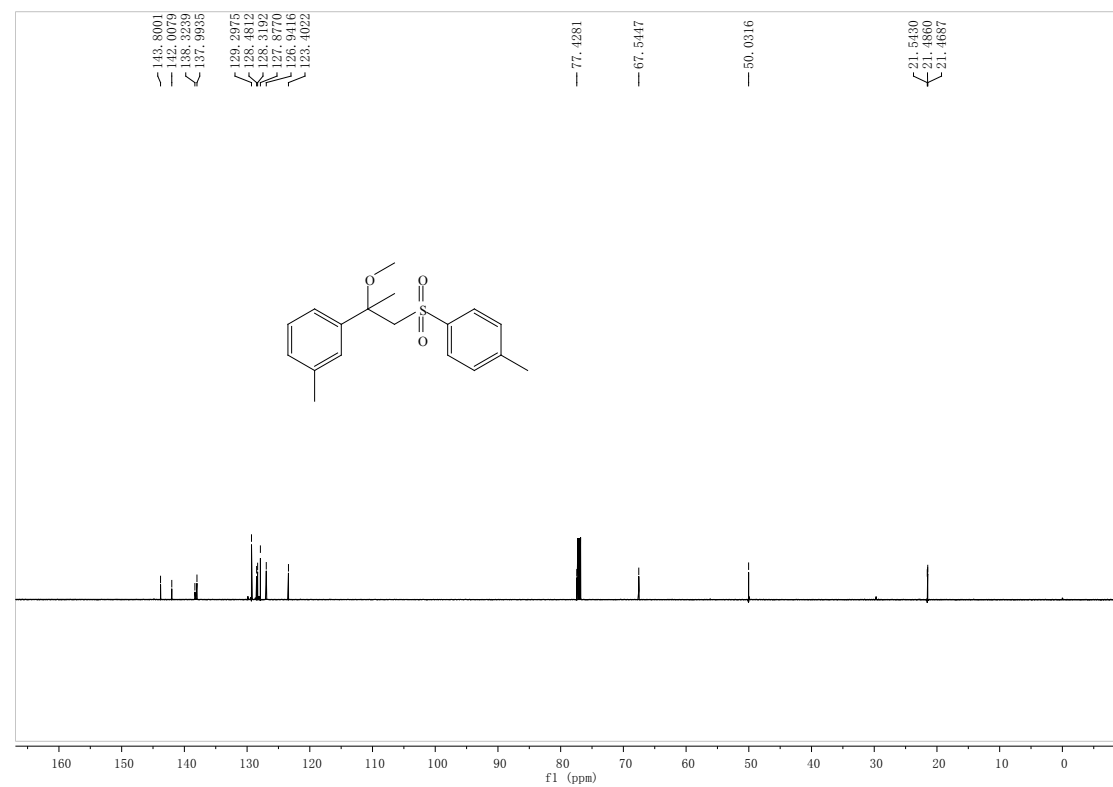

**Figure S26.**  $^1\text{H-NMR}$  (600 MHz,  $\text{CDCl}_3$ ) of **4b**:

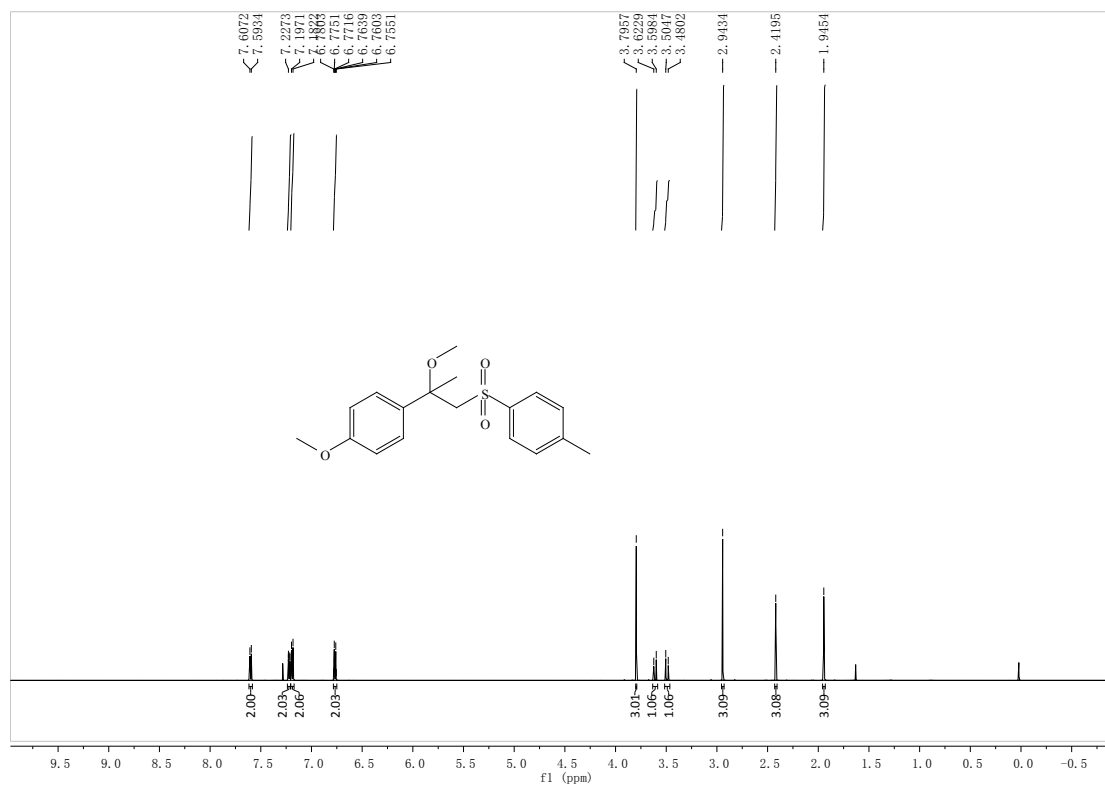

**Figure S27.**  $^{13}\text{C}\{^1\text{H}\}$  NMR (150 MHz,  $\text{CDCl}_3$ ) of **4b**:

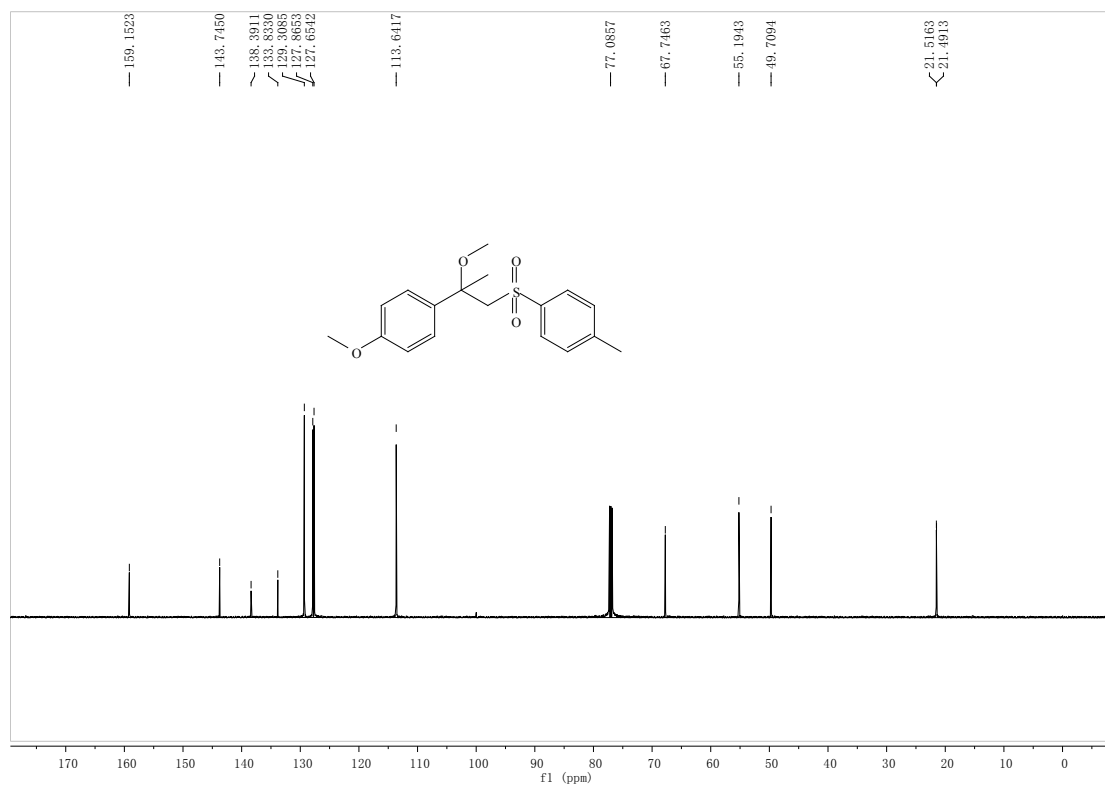



Figure S28.  $^1\text{H-NMR}$  (600 MHz,  $\text{CDCl}_3$ ) of **4c**:

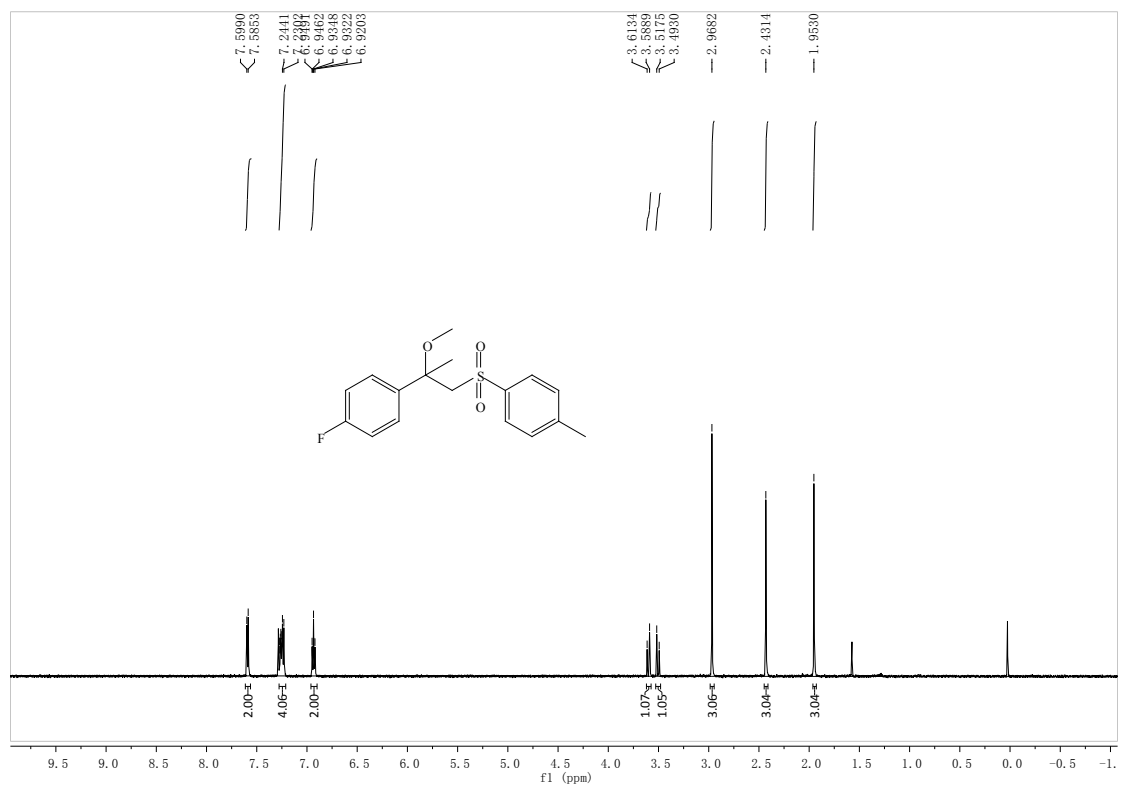

Figure S29.  $^{13}\text{C}\{^1\text{H}\}$  NMR (150 MHz,  $\text{CDCl}_3$ ) of **4c**:

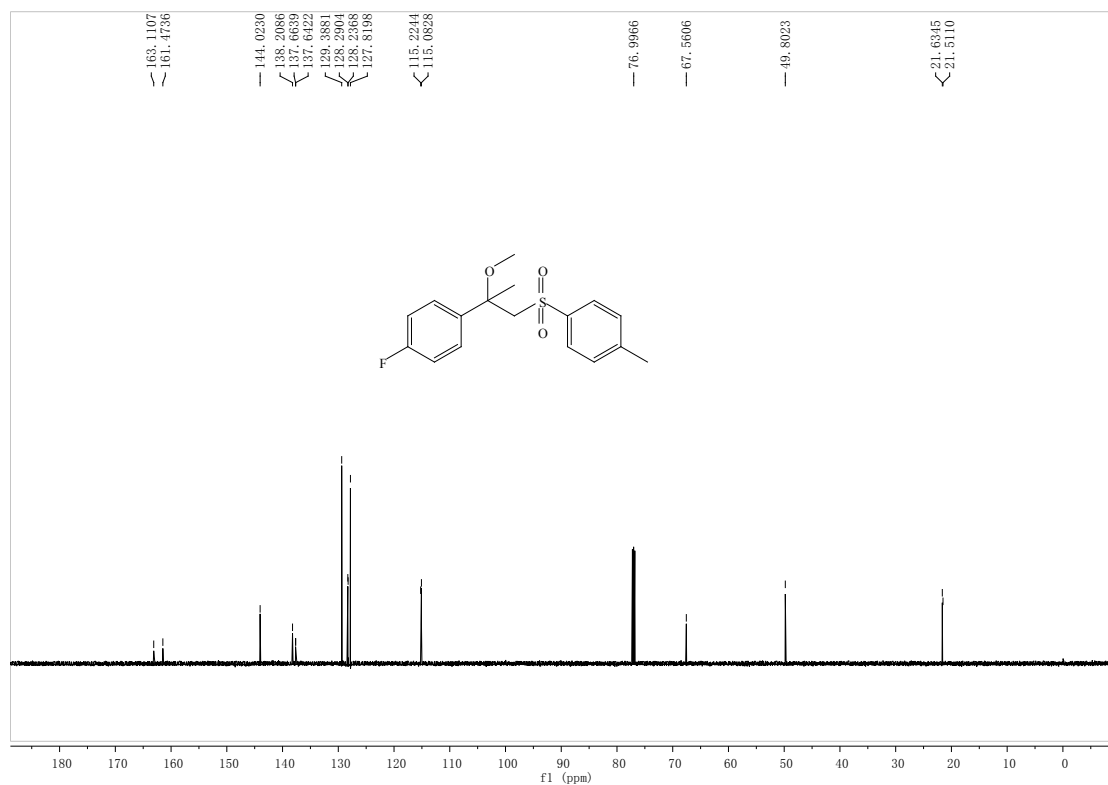

**Figure S30.**  $^{19}\text{F}$  NMR (565 MHz,  $\text{CDCl}_3$ ) of **4c**:

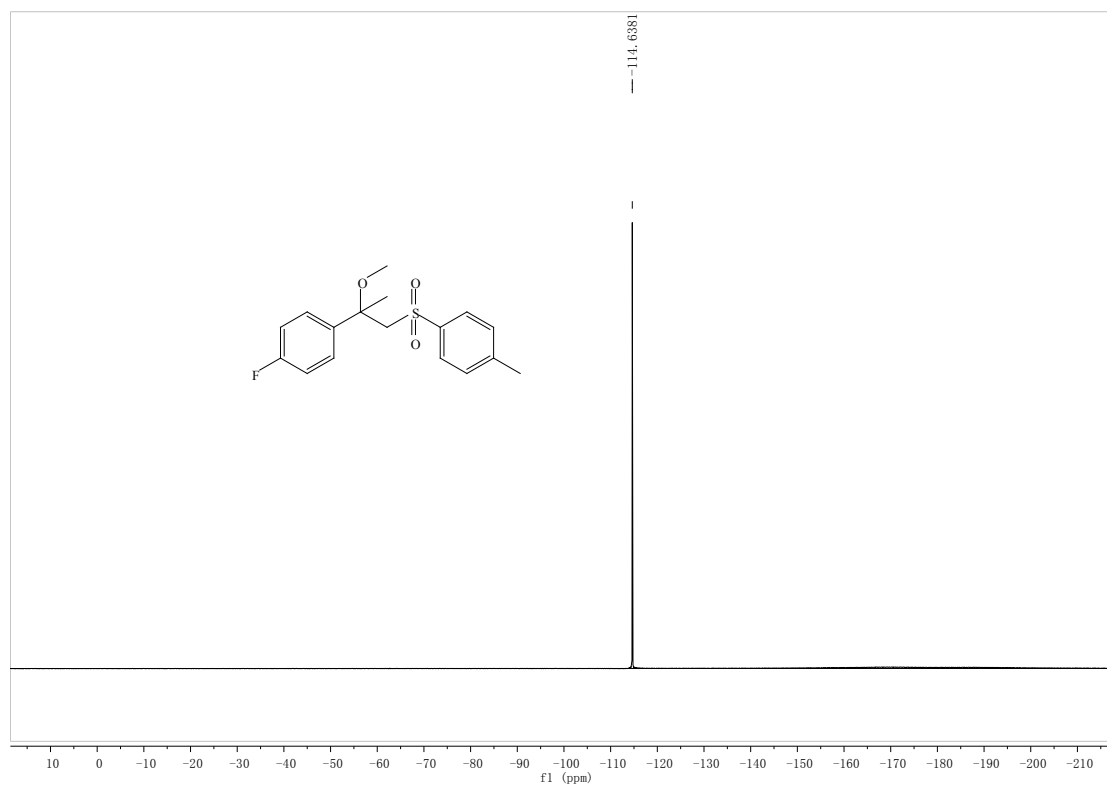

**Figure S31.**  $^1\text{H-NMR}$  (600 MHz,  $\text{CDCl}_3$ ) of **4d**:

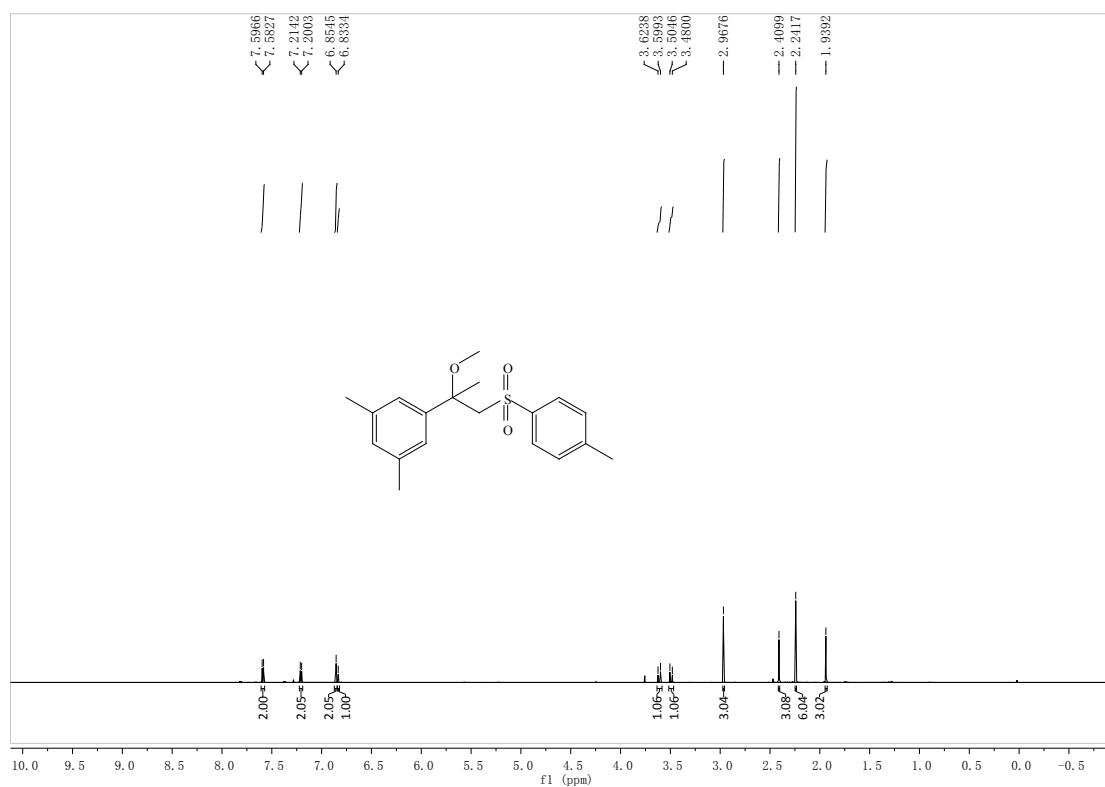

**Figure S32.**  $^{13}\text{C}\{^1\text{H}\}$  NMR (150 MHz,  $\text{CDCl}_3$ ) of **4d**:

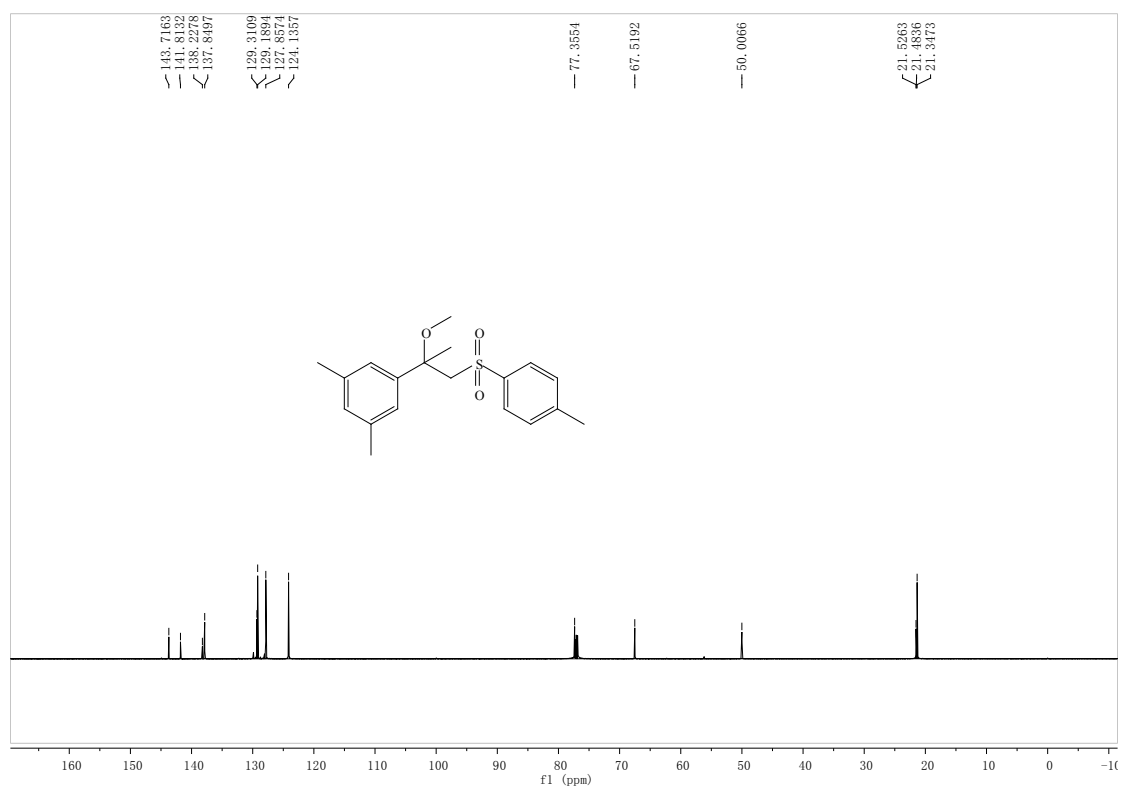

Figure S33. <sup>1</sup>H-NMR (600 MHz, CDCl<sub>3</sub>) of 4e:

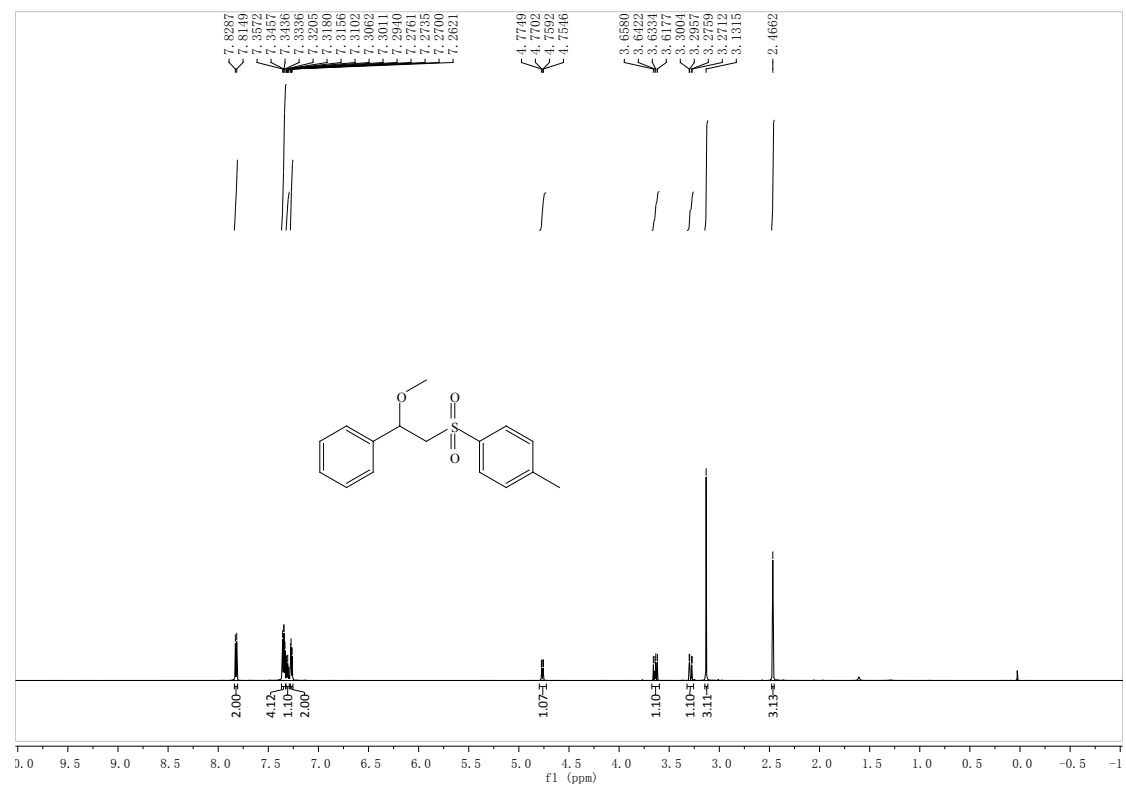

Figure S34.  $^1\text{H-NMR}$  (600 MHz,  $\text{CDCl}_3$ ) of **4f**:

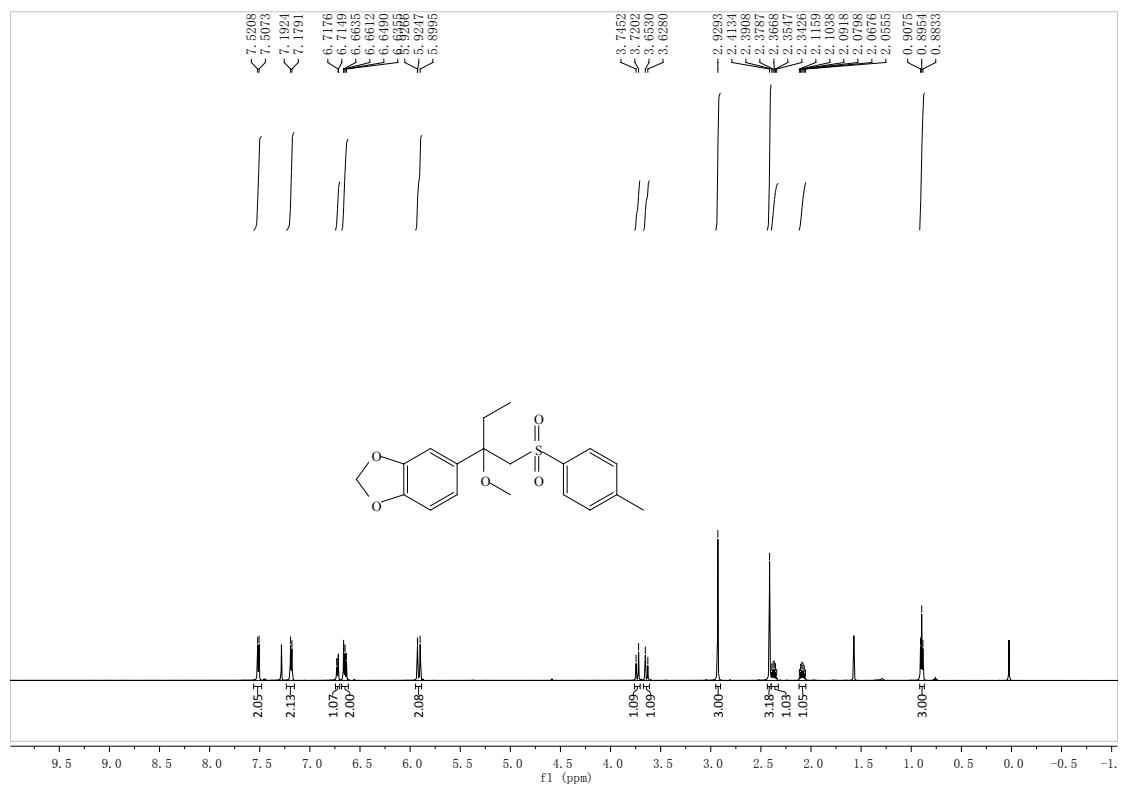

Figure S35.  $^{13}\text{C}\{^1\text{H}\}$  NMR (150 MHz,  $\text{CDCl}_3$ ) of **4f**:

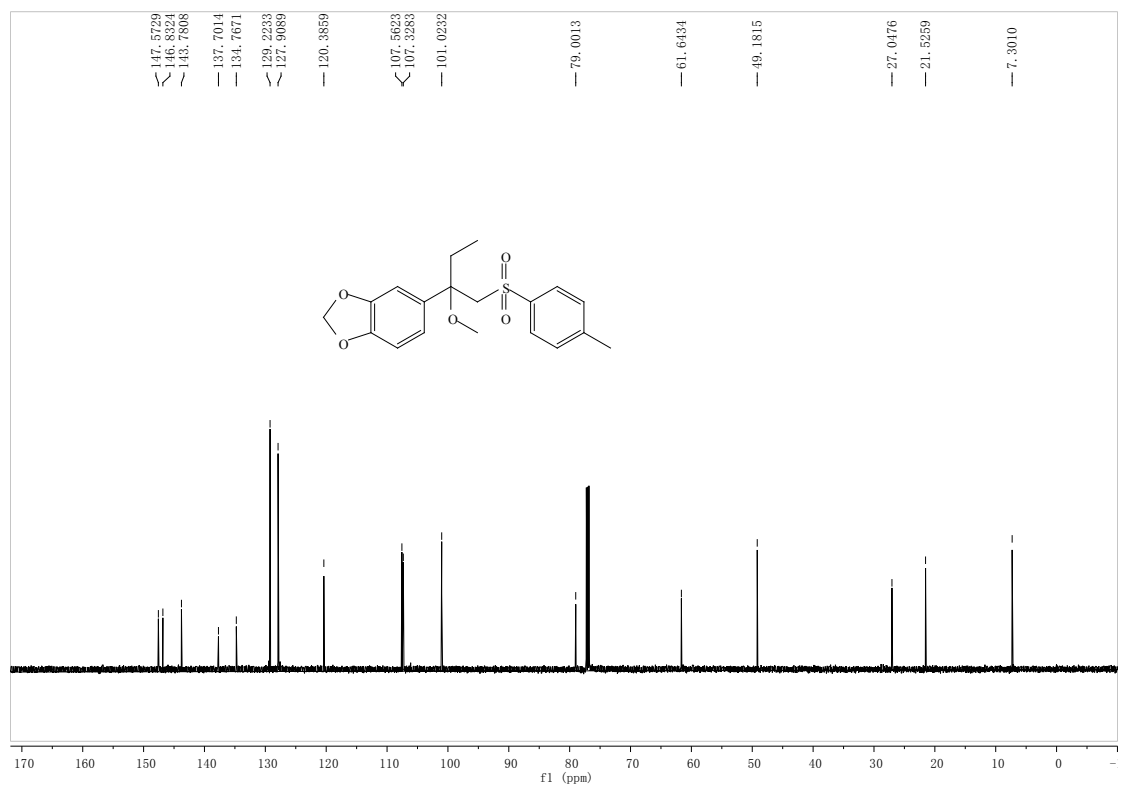

Figure S36.  $^1\text{H-NMR}$  (600 MHz,  $\text{CDCl}_3$ ) of **4g**:

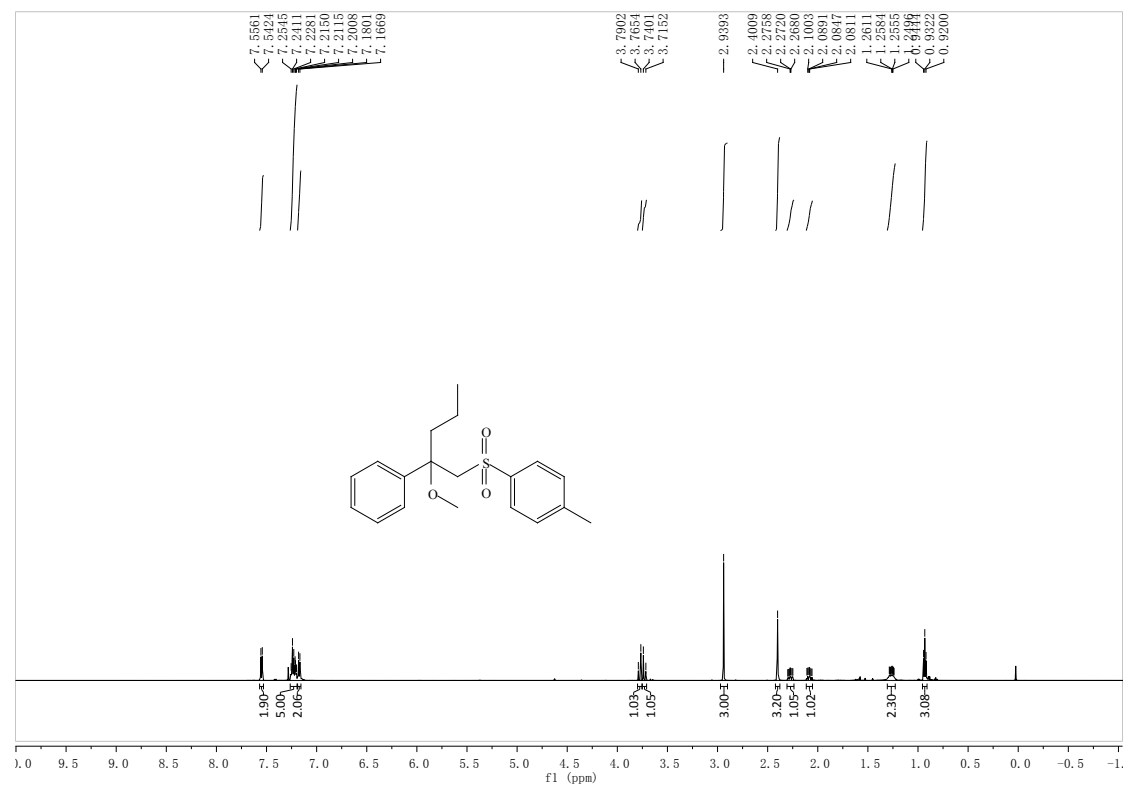

Figure S37.  $^{13}\text{C}\{^1\text{H}\}$  NMR (150 MHz,  $\text{CDCl}_3$ ) of **4g**:

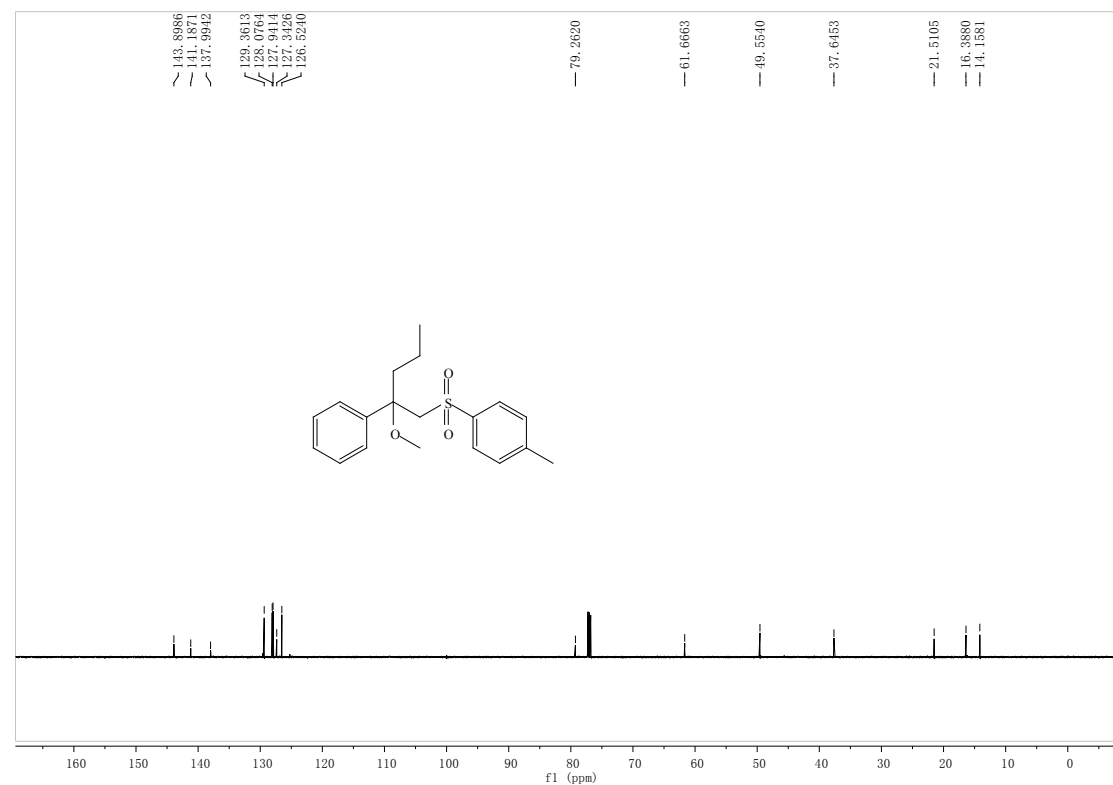

**Figure S38.**  $^1\text{H-NMR}$  (600 MHz,  $\text{CDCl}_3$ ) of **4h**:

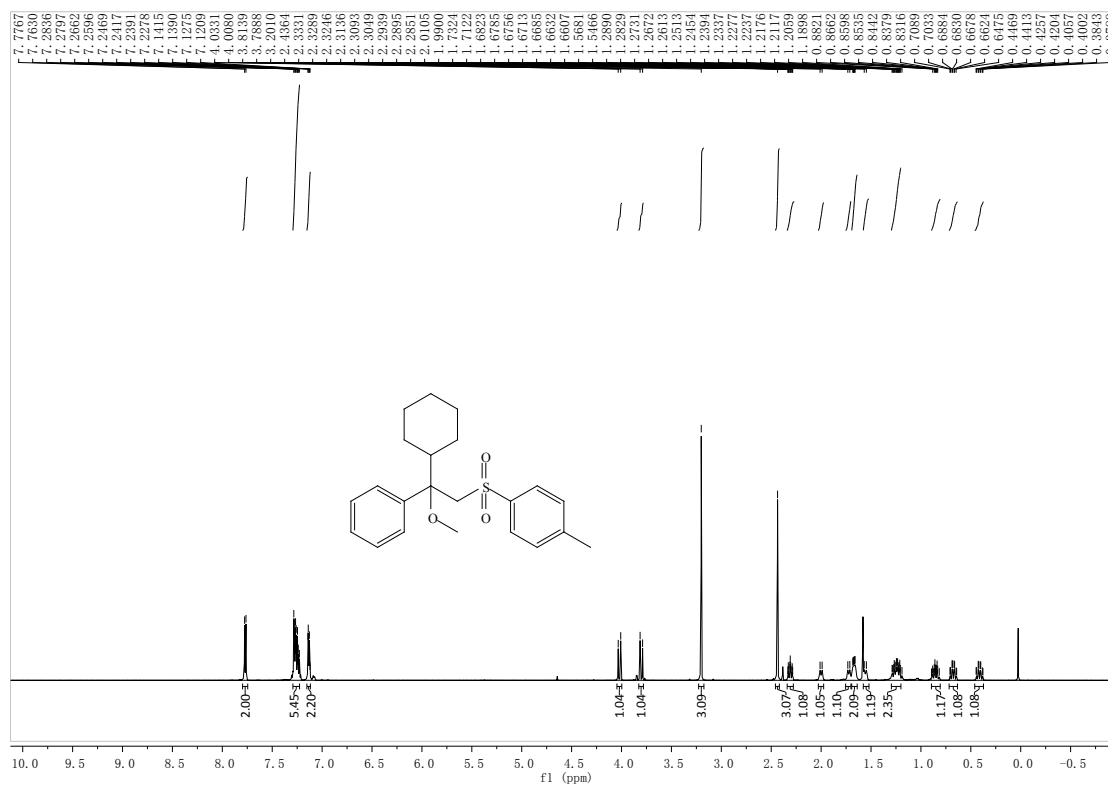

**Figure S39.**  $^{13}\text{C}\{^1\text{H}\}$  NMR (150 MHz,  $\text{CDCl}_3$ ) of **4h**:

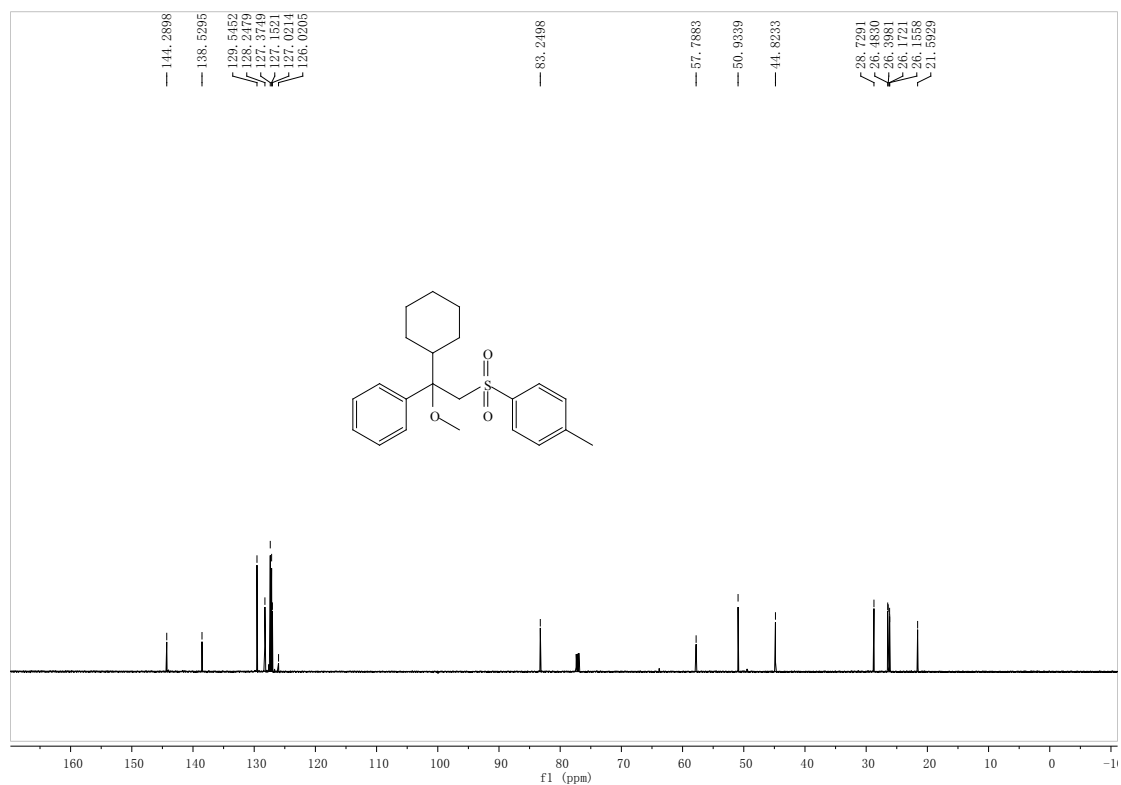

Figure S40.  $^1\text{H-NMR}$  (600 MHz,  $\text{CDCl}_3$ ) of **5a**:

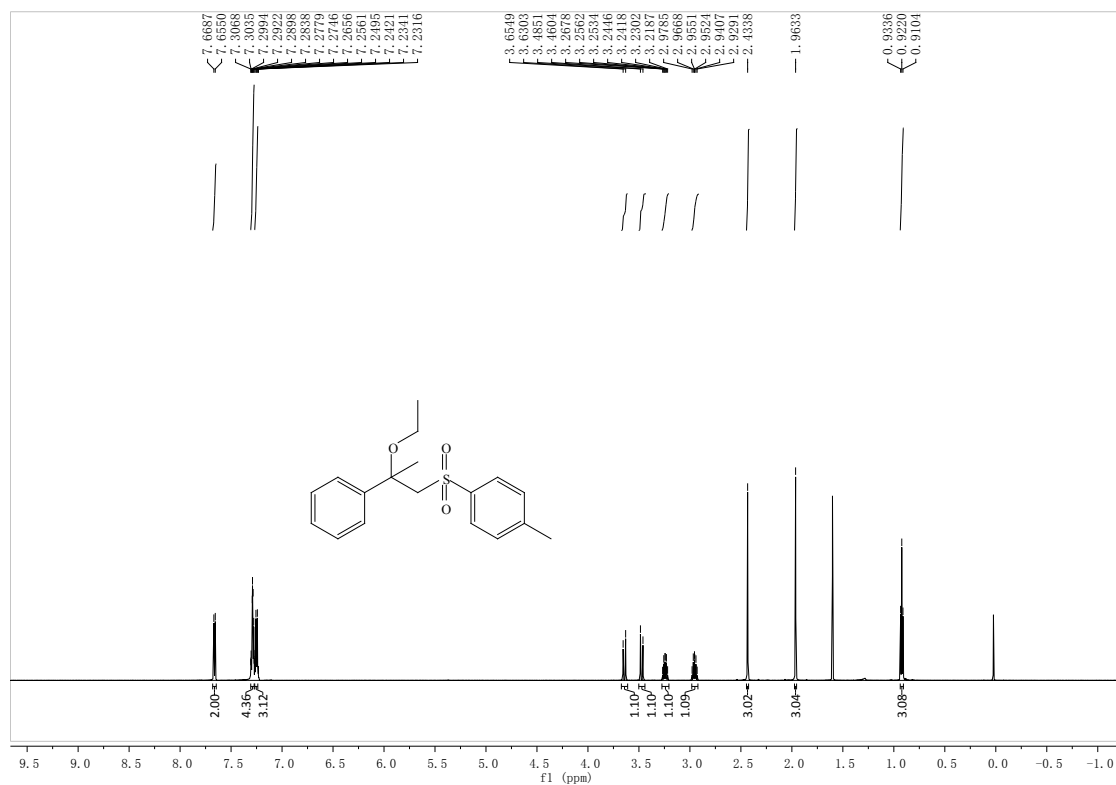

Figure S41.  $^{13}\text{C}\{^1\text{H}\}$  NMR (150 MHz,  $\text{CDCl}_3$ ) of **5a**:

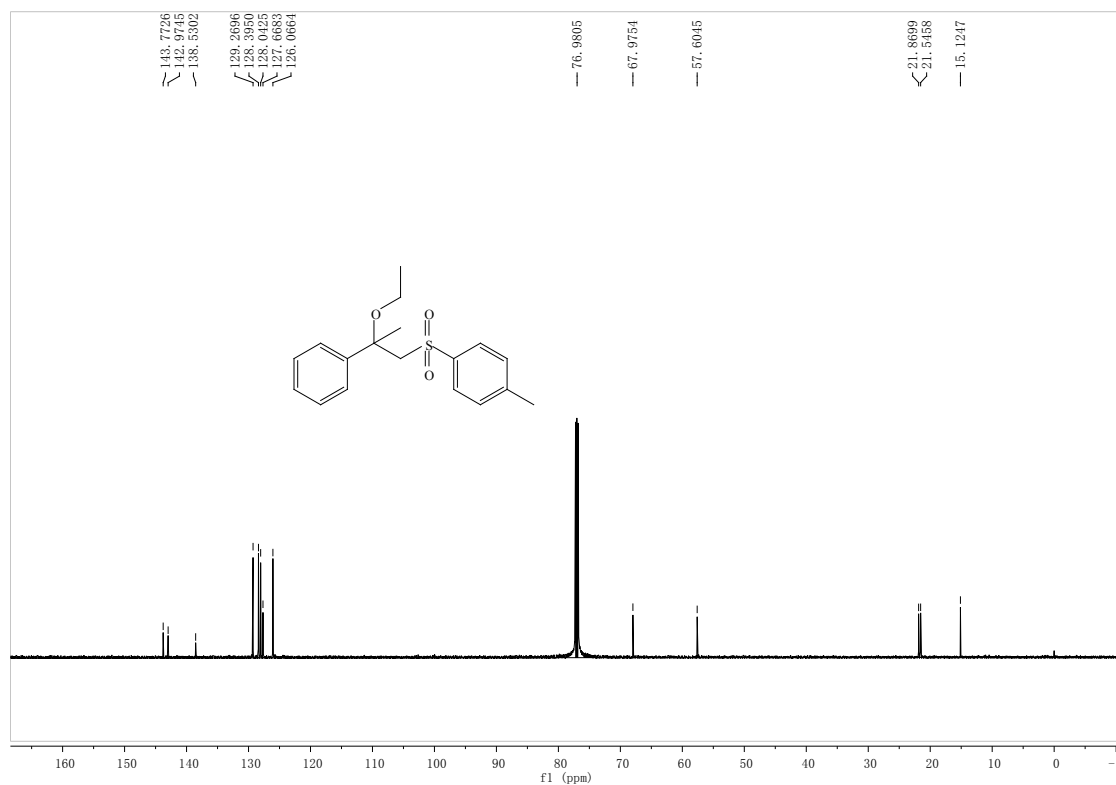



**Figure S42.**  $^1\text{H-NMR}$  (600 MHz,  $\text{CDCl}_3$ ) of **5b**:

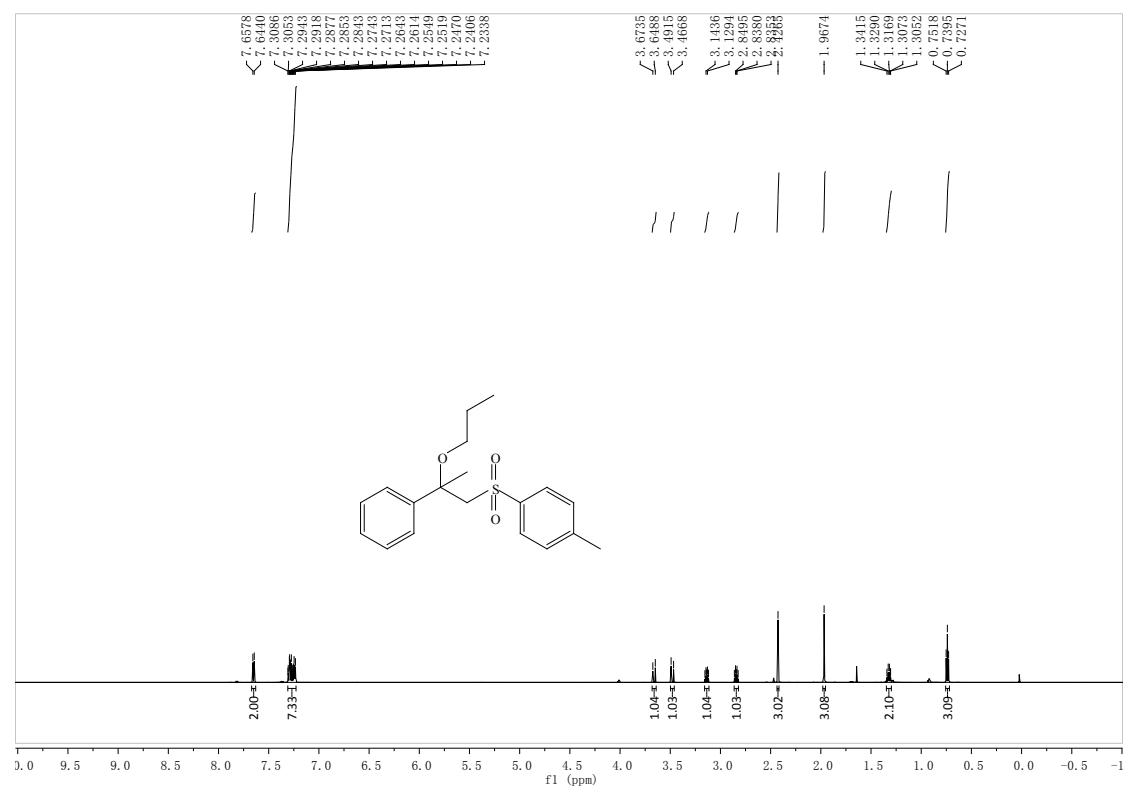

**Figure S43.**  $^{13}\text{C}\{^1\text{H}\}$  NMR (150 MHz,  $\text{CDCl}_3$ ) of **5b**:

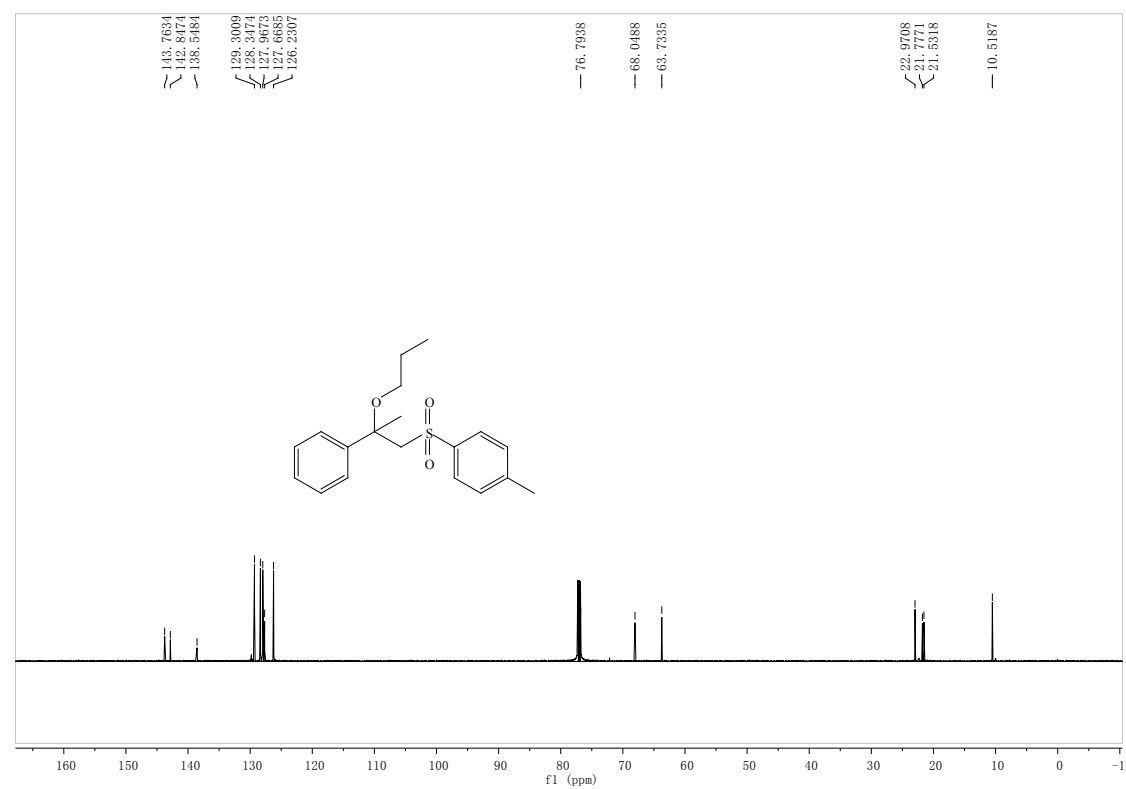

Figure S44.  $^1\text{H-NMR}$  (600 MHz,  $\text{CDCl}_3$ ) of **5c**:

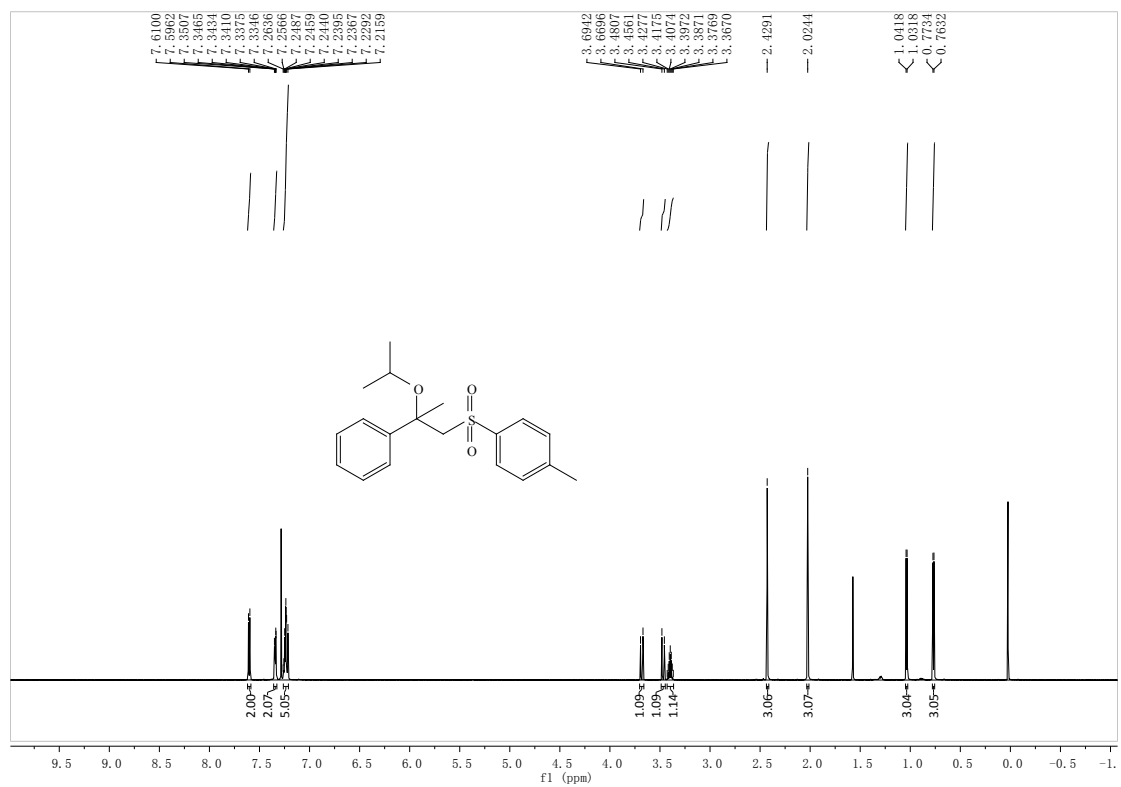

Figure S45.  $^{13}\text{C}\{^1\text{H}\}$  NMR (150 MHz,  $\text{CDCl}_3$ ) of **5c**:

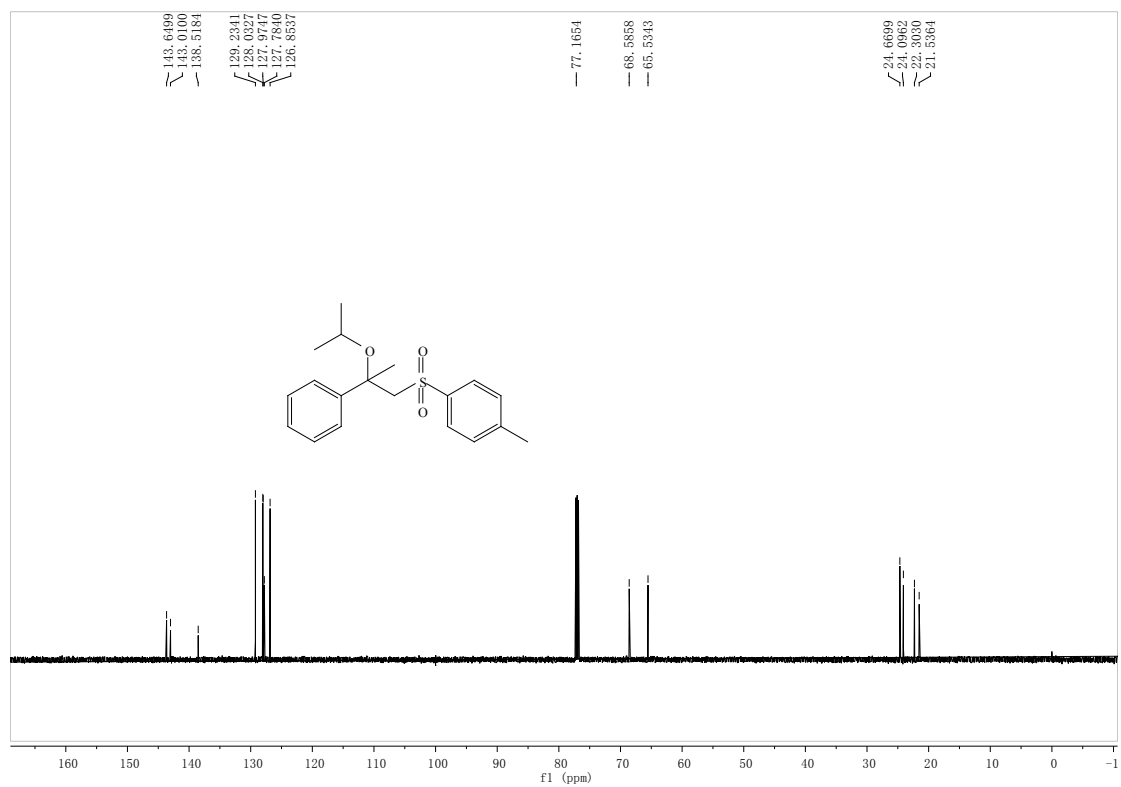

Supplement: ao9b02442_si_001.pdf [file ao9b02442_si_001.pdf]
